# Supplementary material
Source: publisher figshare collection journal article supplement (https://acs.figshare.com/ndownloader/files/4010359)
Supplement: Supplementary file 1 [file 4010359]

# Supplemental Information

## **Quantitative phosphoproteomics using acetone-based peptide labeling: Method evaluation and application to a cardiac ischemia/reperfusion model.**

Aruna B. Wijeratne<sup>1</sup>, Janet R. Manning<sup>2</sup>, Jo El J. Schultz<sup>2</sup> Kenneth D. Greis<sup>1\*</sup>

<sup>1</sup>Department of Cancer Biology and <sup>2</sup>Department of Pharmacology & Cell Biophysics, University of Cincinnati College of Medicine, Cincinnati, OH

\*correspondence: 3125 Eden Avenue; Vontz Center, Room 2306; Cincinnati, OH 45267 USA; (email) [kenneth.greis@uc.edu](mailto:kenneth.greis@uc.edu); (phone) (513) 558-7102; (fax) 513-558-4454

**Supplemental Table 1** Summary of proteins with higher degree of phosphorylation in LMW FGF2 “expressed” cardiac tissue extracts and the confidently identified and quantified phosphopeptides. MS/MS profiles are illustrated in supplementary document and the references for figures are also included. Quantitative figures representing average MS-profiles and XIC profiles for each phosphopeptide/phosphosite are illustrated in both main document and supplementary document. Respective references for these figures are also included in the table. For each phosphopeptide pair, quantification value represented as average  $\log_2[H/L]^*_{\text{Pair}}$  from five biologically distinct pairwise comparisons is also indicated with the standard error ( $\pm$  SE). \* Normalized to internal standard—fully labeled phosphopeptide representing bovine  $\alpha$ -casein. † Could not distinguish the specific site, thus same value was assigned for either sites.

| Protein/ Phosphosite                                                                        | Phosphopeptide(s)                                                          | MS/MS profile | Quantitative Figure | Average $\log_2[H/L]^*_{\text{Pair}}$<br>$\pm$ SE (n=5) |
|---------------------------------------------------------------------------------------------|----------------------------------------------------------------------------|---------------|---------------------|---------------------------------------------------------|
| Microtubule-associated protein tau isoform a<br>/ Ser-191, Ser-393                          | <b>184-SGYSSPG(pS)PGTPGSR-198</b>                                          | Sup.Fig.2     | Sup.Fig.17          | $0.76 \pm 0.10$                                         |
|                                                                                             | <b>385-SPVVS GDT(pS)PR-395</b>                                             | Sup.Fig.3     | Sup.Fig.18          | $1.49 \pm 0.29$                                         |
| Gap junction alpha-1 protein<br>/ Ser-297                                                   | <b>288-LVTGDRNNS(pS)CR-299</b>                                             | Sup.Fig.4     | Sup.Fig.19          | $1.39 \pm 0.39$                                         |
| Septin-2 a<br>/ Ser-218                                                                     | <b>210-IYHLPDAE(pS)DEDEDFKEQTR-229</b>                                     | Sup.Fig.5     | Sup.Fig.20          | $0.89 \pm 0.24$                                         |
| Heat shock protein beta-6<br>/ Ser-157                                                      | <b>123-</b><br>LPPGVDPAAVTSALSPEGVLSIQATPASAQA<br>QLP(pS)PPAAK-162         | Sup.Fig.6     | Sup.Fig.21          | $1.42 \pm 0.24$                                         |
| Myosin light chain kinase, smooth muscle /<br>Ser-1469                                      | <b>1437-</b><br>AVNVYGTSEPSQESELTA VGEKPEEPKDEV<br>EV(pS)DDDEKEPEVDYR-1481 | Sup.Fig.7     | Sup.Fig.22          | $0.96 \pm 0.29$                                         |
| Myosin regulatory light chain 2,<br>ventricular/cardiac muscle isoform/ Ser-14<br>or Ser-15 | <b>8-KRIEGG(pS)SNVFSMF EQTQIQEFK-30</b>                                    | Sup.Fig.8     | Sup.Fig.23          | $1.14 \pm 0.51$                                         |
|                                                                                             | <b>10-IEGGS(pS)NVFSMF EQTQIQEFK-30</b>                                     | Sup.Fig.9     | Sup.Fig.24          | $1.16 \pm 0.59$                                         |
| Myosin-binding protein C, cardiac-type<br>/ Thr-281; Ser-273; Ser-282 or Ser-284            | <b>281-(pT)SDSHEDAGTLDFSSLLK-298</b>                                       | Sup.Fig.10    | Sup.Fig.25          | $1.35 \pm 0.38$                                         |
|                                                                                             | <b>271-RT(pS)LAGAGR-279</b>                                                | Sup.Fig.11    | Sup.Fig.26          | $2.12 \pm 0.51$                                         |
|                                                                                             | <b>280-RT(pS)DSHEDAGTLDFSSLLK-299</b>                                      | Sup.Fig.12    | Fig.2C              | $1.38 \pm 0.38^*$                                       |
|                                                                                             | <b>280-RTSD(pS)HEDAGTLDFSSLLK-299</b>                                      | Sup.Fig.13    | Fig.2C              | $1.38 \pm 0.38^*$                                       |
| Cytochrome b-c1 complex subunit 1,<br>mitochondrial precursor / Ser-212                     | <b>210-RL(pS)RTDLTDYLN R-222</b>                                           | Sup.Fig.14    | Sup.Fig.27          | $1.02 \pm 0.43$                                         |
| 2-Oxoisovalerate dehydrogenase subunit<br>alpha, mitochondrial / Ser-338                    | <b>334-IGHH(pS)TSDDSSAYR-347</b>                                           | Sup.Fig.15    | Sup.Fig.28          | $1.23 \pm 0.46$                                         |
| Myoglobin<br>/ Thr-68                                                                       | <b>65-HGC(pT)VLTALGTILK-78</b>                                             | Sup.Fig.16    | Sup.Fig.29          | $1.92 \pm 0.93$                                         |

**A. MS/MS Spectra for Phosphopeptides with Statistically Confident  
Quantitation**

# 1. alpha-S1-casein precursor [Bos taurus]: Internal Standard

[r6: RABA:d(6)-tag; p: phosphorylation]

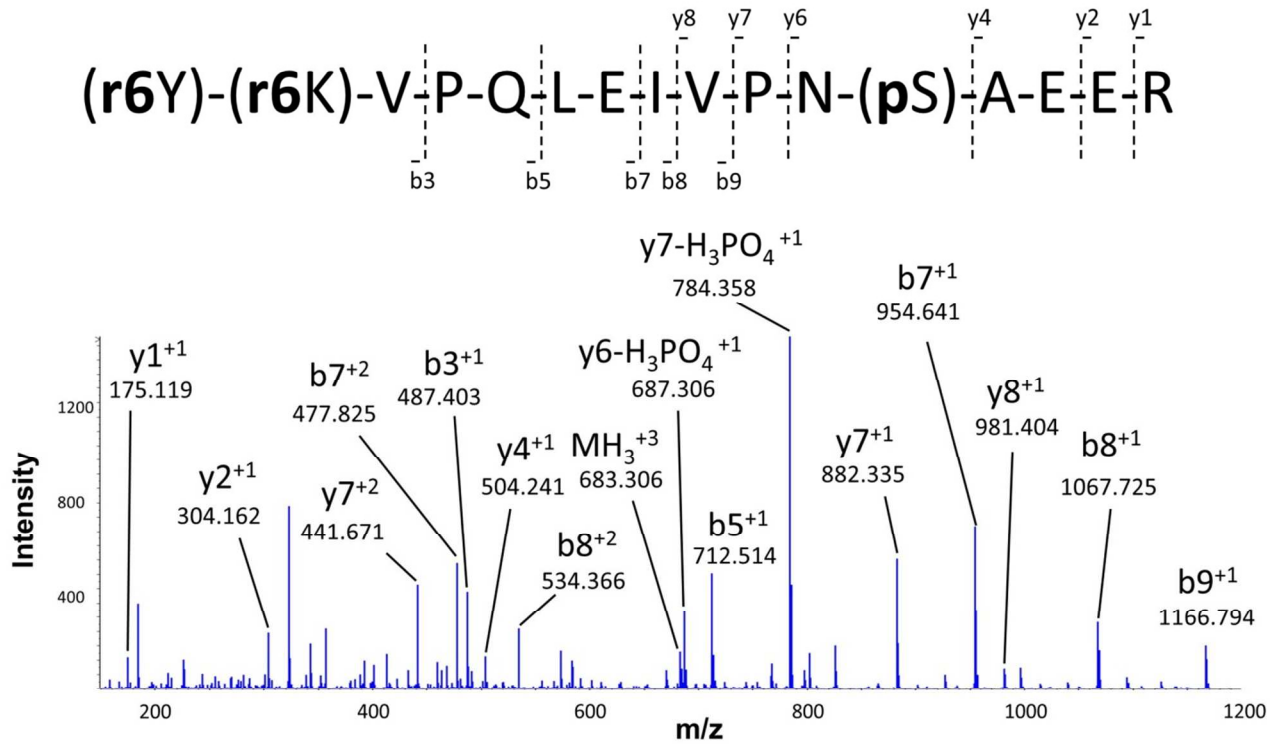

**Supplementary Figure 1:** MS/MS fragmentation spectrum obtained for the precursor ion at m/z 683.3787 Da (+3), that represents 104-YKVPQLEIVPN(pS)AEER-119. The N-terminus and the lysine residue @2 of the peptide are d6-RABA-tagged. The N-terminus, the primary amine groups of lysine residues @2 of the peptide are d6-RABA-tagged. Note: each d6-RABA tagging adds 48 Da to the peptide mass. Fragmentation was performed by application of collision energy, 43.0 in vendor-defined arbitrary units.

**[r6: RABA:d(6)-tag; p: phosphorylation]**

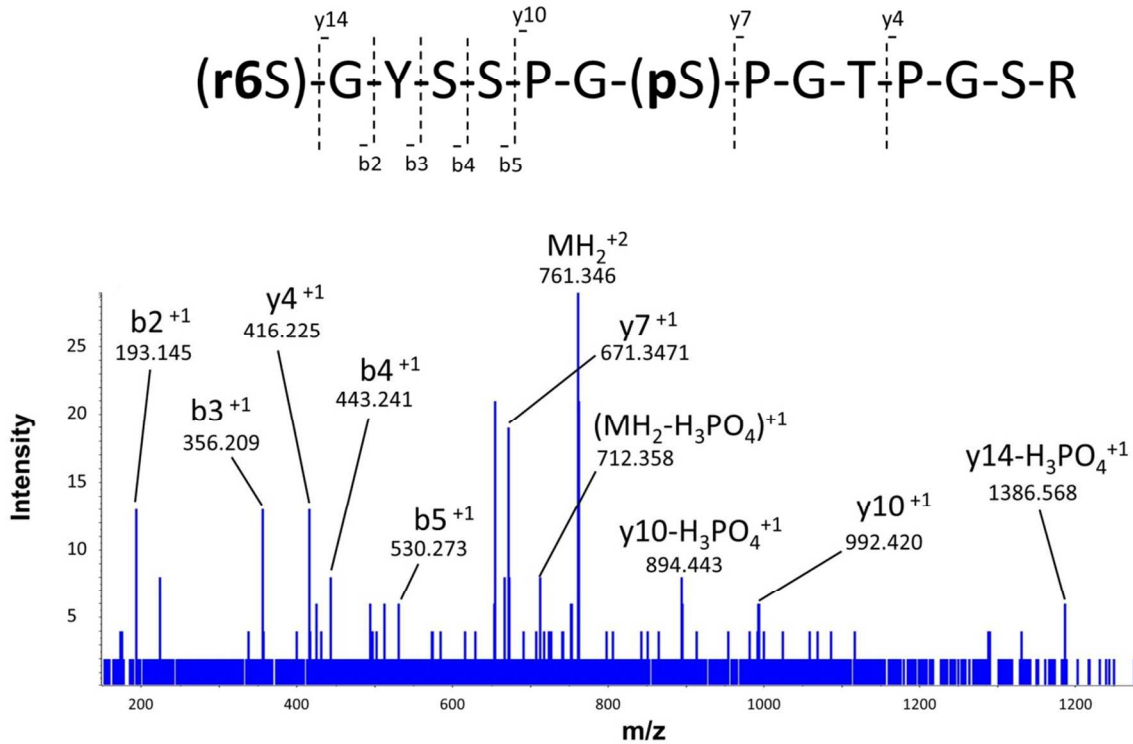

**Supplementary Figure 3:** MS/MS fragmentation spectrum obtained for the precursor ion at  $m/z$  761.3481 Da (+2), that represents 184-SGYSSPG(**pS**)PGTPGSR-198. The N-terminus of the peptide is d6-RABA-tagged. Note: each d6-RABA tagging adds 48 Da to the peptide mass. Fragmentation was performed by application of collision energy, 43.0 in vendor-defined arbitrary units.

**3. Microtubule-associated protein tau isoform a [Mus musculus]/ Ser-393.**  
**[r6: RABA:d(6)-tag; p: phosphorylation]**

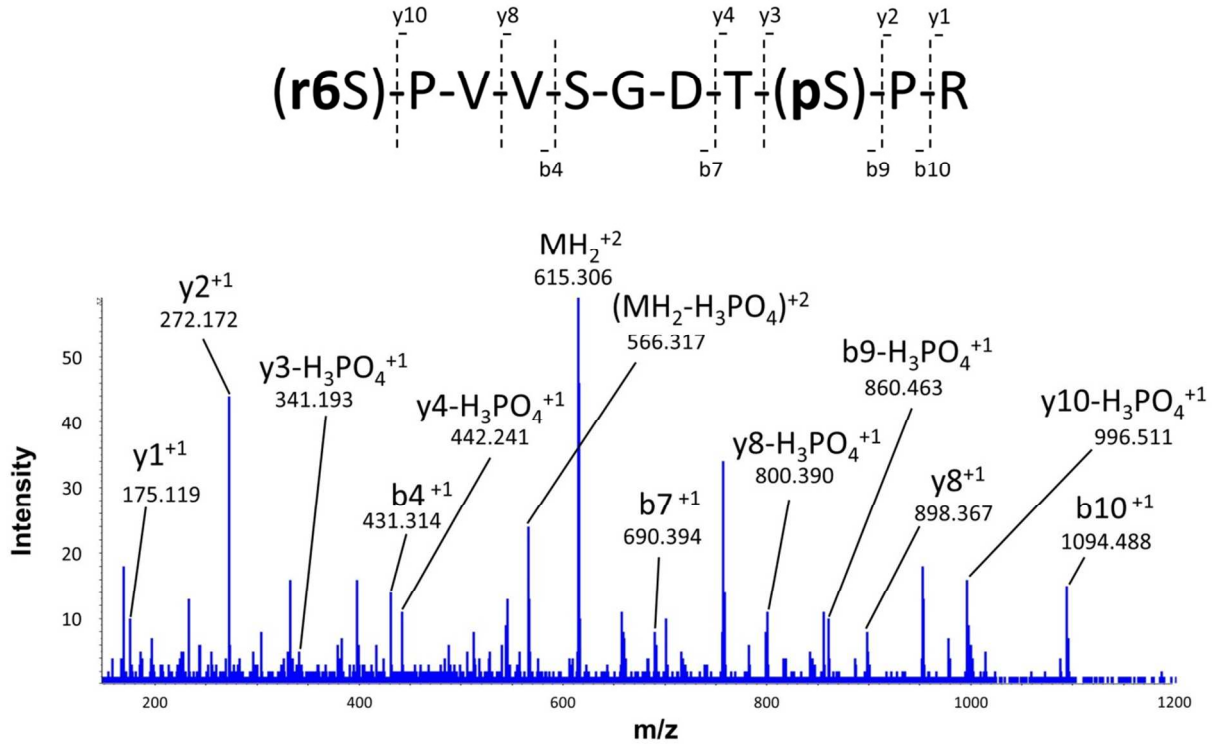

**Supplementary Figure 4:** MS/MS fragmentation spectrum obtained for the precursor ion at m/z 615.304 (+2), that represents 385-SPVVSGDT(pS)PR-395. The N-terminus of the peptide is d6-RABA-tagged. Note: each d6-RABA tagging adds 48 Da to the peptide mass. Fragmentation was performed by application of collision energy, 43.0 in vendor-defined arbitrary units.

#### 4. Gap junction alpha-1 protein [Mus musculus]/Ser-297

[r6: RABA:d(6)-tag; p: phosphorylation]

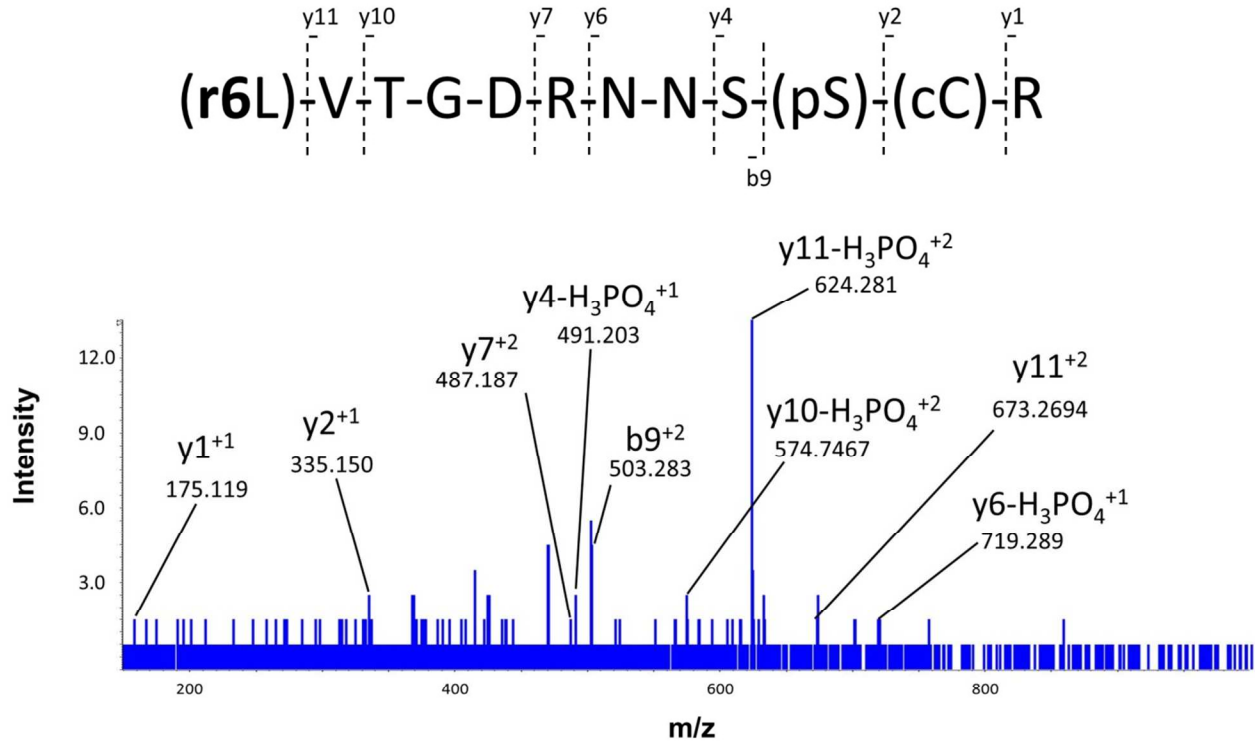

**Supplementary Figure 5:** MS/MS fragmentation spectrum obtained for the precursor ion at m/z : 502.9007 Da (+3), that represents 288-LVTGDRNNS(pS)CR-299. The N-terminus of the peptide is d6-RABA-tagged. The cystine residue @11 is carbamidomethylated. Note: each d6-RABA tagging adds 48 Da to the peptide mass. Fragmentation was performed by application of collision energy, 43.0 in vendor-defined arbitrary units.

**[r6: RABA:d(6)-tag; p: phosphorylation]**

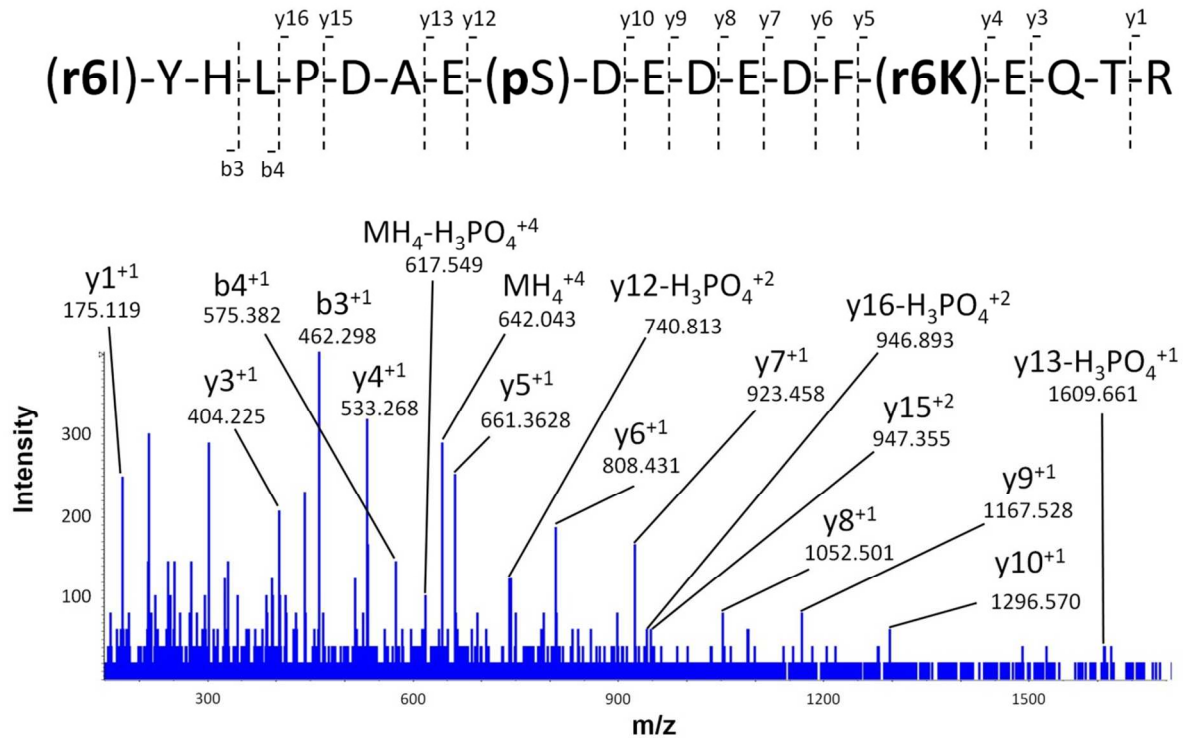

**Supplementary Figure 6:** MS/MS fragmentation spectrum obtained for the precursor ion at m/z: 642.038 Da (+4), that represents 210-IYHLPDAE(**pS**)DEDEDKFQTR-229. The N-terminus of the peptide and the primary amine group of lysine residue @16 of the peptide are d6-RABA-tagged. Note: each d6-RABA tagging adds 48 Da to the peptide mass. Fragmentation was performed by application of collision energy, 43.0 in vendor-defined arbitrary units.



## 6. Heat shock protein beta-6 [Mus musculus]/Ser-157

[r0: RABA:d(0)-tag; p: phosphorylation]

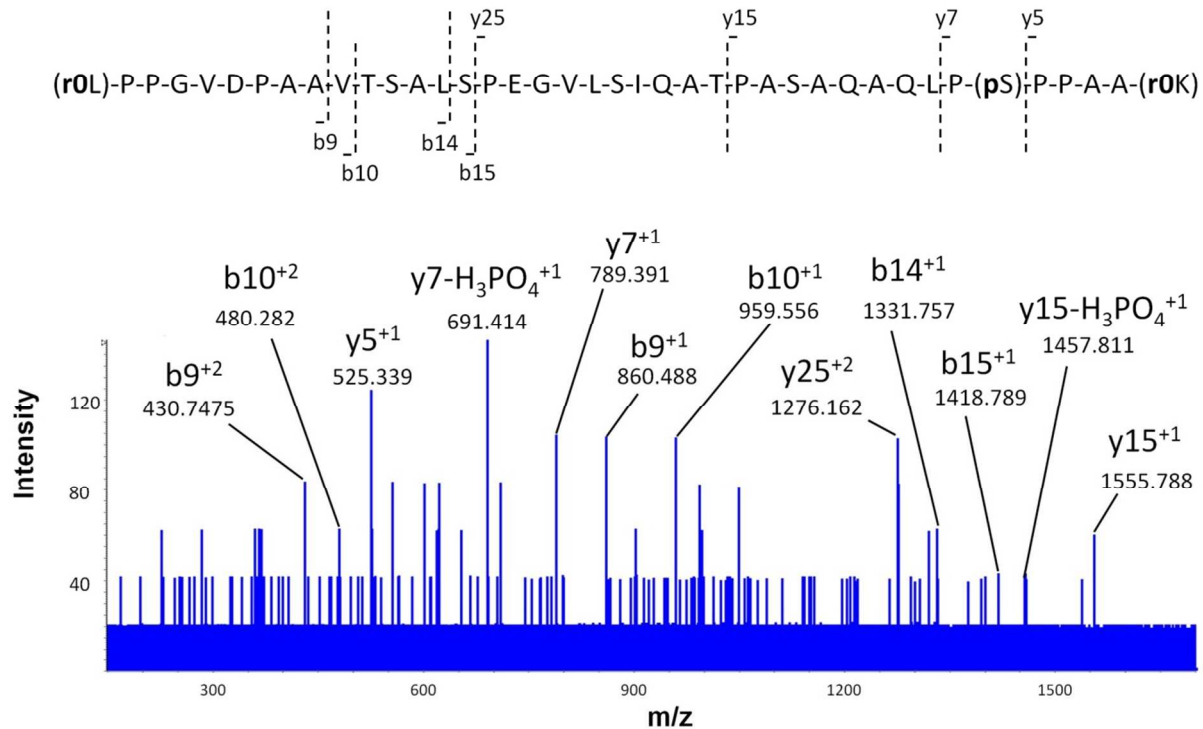

**Supplementary Figure 7:** MS/MS fragmentation spectrum obtained for the precursor ion at m/z: 993.0339 Da (+4), that represents 123-LPPGVDPAAVTSALSPEGVLSIQATPASAQAQLP(pS)PPAAK-162. The N-terminus of the peptide and the primary amine group of lysine residue @40 of the peptide are d0-RABA-tagged. Note: each d0-RABA tagging adds 42 Da to the peptide mass. Fragmentation was performed by application of collision energy, 43.0 in vendor-defined arbitrary units.

7. **Myosin light chain kinase, smooth muscle [Mus musculus]/Ser-1469**  
**[r6: RABA:d(6)-tag; p: phosphorylation]**

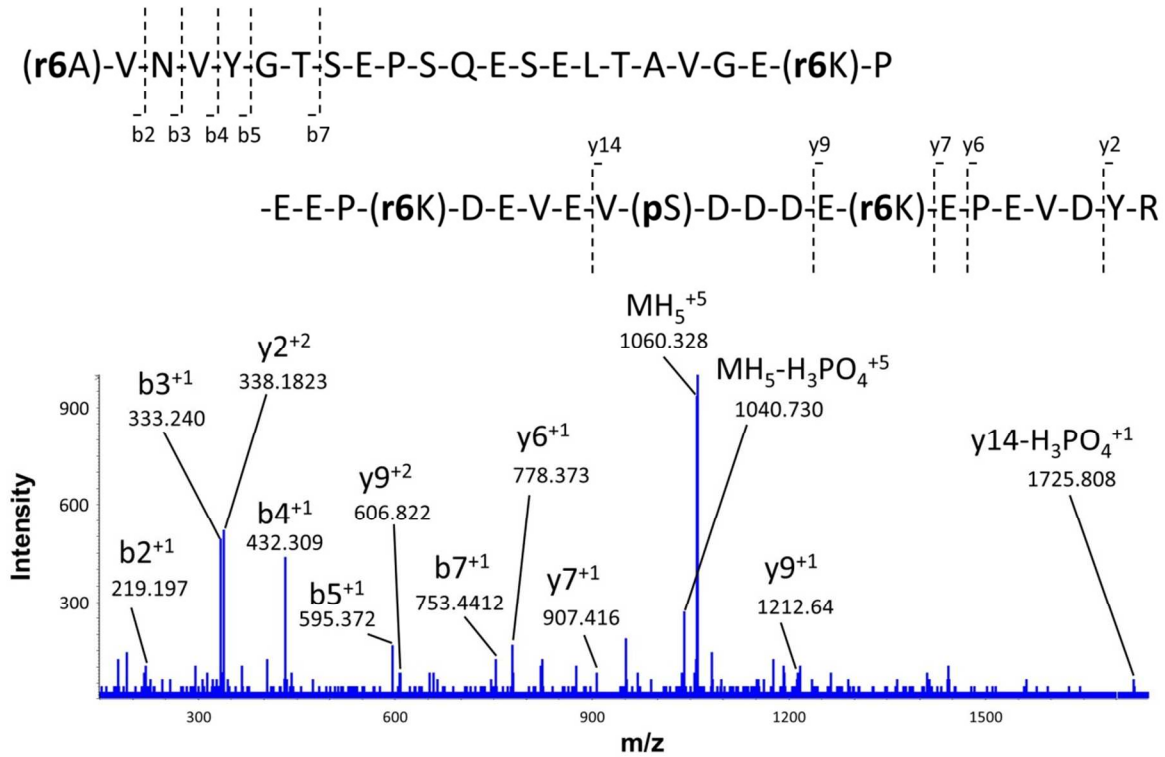

**Supplementary Figure 8:** MS/MS fragmentation spectrum obtained for the precursor ion at m/z: 1060.119 (+5), that represents 1437-AVNVYGTSEPSQESELTA VGEKPEEPKDEVEV(pS)DDDEKEPEVDYR-1481. The N-terminus of the peptide and the primary amine group of lysine residue @22 @27 and @38 of the peptide are d6-RABA-tagged. Note: each d6-RABA tagging adds 48 Da to the peptide mass. Fragmentation was performed by application of collision energy, 43.0 in vendor-defined arbitrary units.

8. **Myosin regulatory light chain 2, ventricular/cardiac muscle isoform [Mus musculus]/Ser-14**

[**r6**: RABA:d(6)-tag; **o**: oxidation; **p**: phosphorylation]

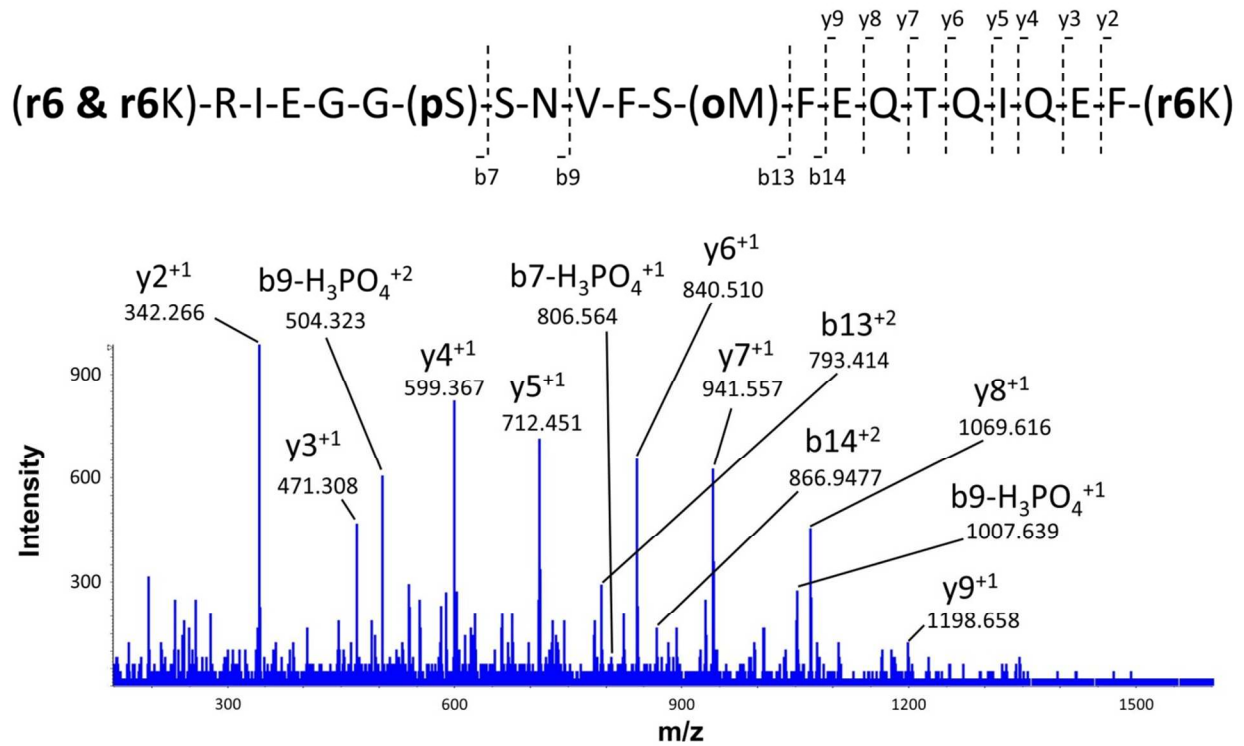

**Supplementary Figure 9:** MS/MS fragmentation spectrum obtained for the precursor ion at m/z: 733.3889 (+4), that represents 8-KRIEGG(**pS**)SNVFSMF EQTQIQEFK-30. The N-terminus of the peptide and the primary amine group of lysine residue @1 and @23 of the peptide are d6-RABA-tagged. The methionine residue @13 is oxidized. Note: each d6-RABA tagging adds 48 Da to the peptide mass. Fragmentation was performed by application of collision energy, 43.0 in vendor-defined arbitrary units.

**9. Myosin regulatory light chain 2, ventricular/cardiac muscle isoform [Mus musculus]/Ser-15**

[**r6**: RABA:d(6)-tag; **o**: oxidation; **p**: phosphorylation]

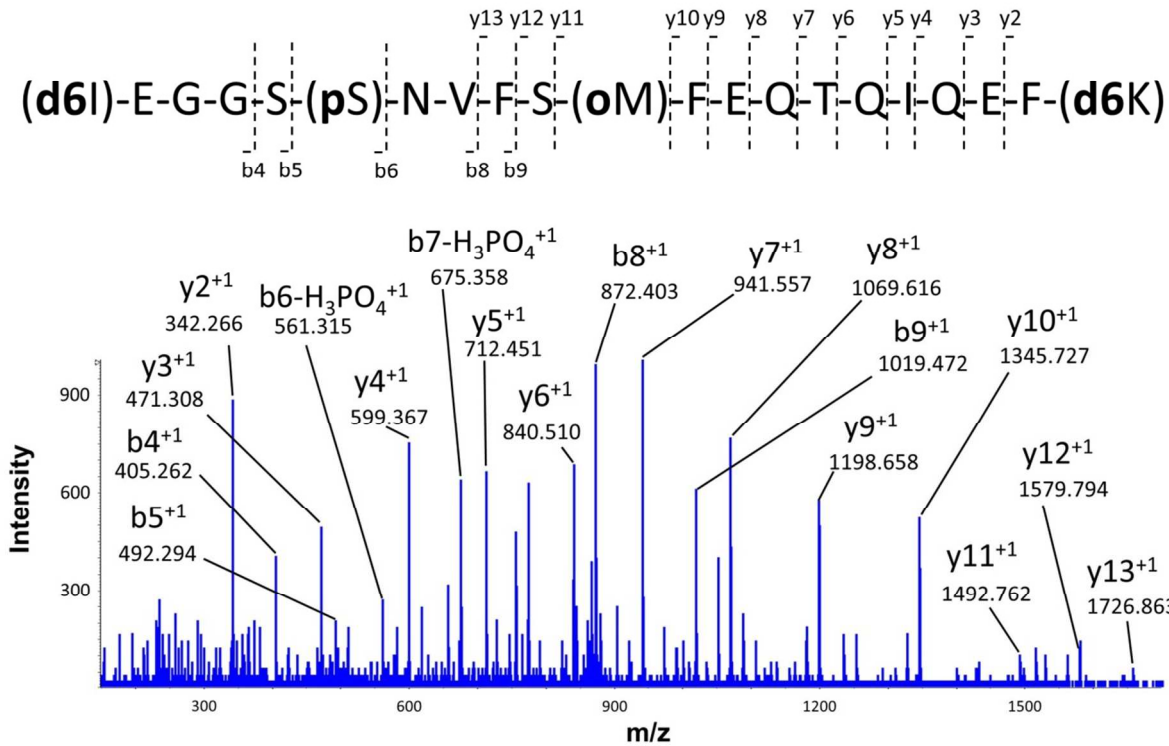

**Supplementary Figure 10:** MS/MS fragmentation spectrum obtained for the precursor ion at m/z: 866.7604 (+3), that represents 10-IEGGS(**pS**)NVFSMFETQIQEFK-30. The N-terminus of the peptide and the primary amine group of lysine residue @21 of the peptide are d6-RABA-tagged. The methionine residue @11 is oxidized. Note: each d6-RABA tagging adds 48 Da to the peptide mass. Fragmentation was performed by application of collision energy, 43.0 in vendor-defined arbitrary units.

**10. Myosin-binding protein C, cardiac-type [Mus musculus]/Thr-281**  
**[r6: RABA:d(6)-tag; p: phosphorylation]**

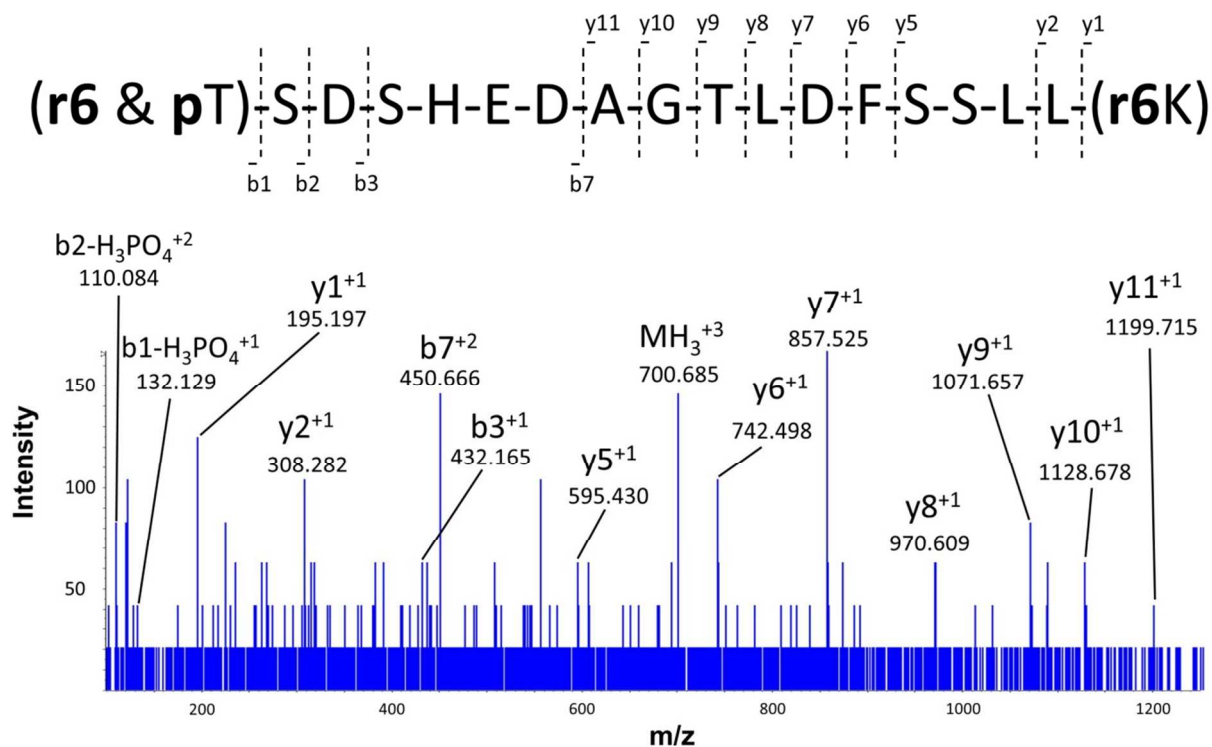

**Supplementary Figure 11:** MS/MS fragmentation spectrum obtained for the precursor ion at m/z: 700.4 Da (3+), that represents 281-(pT)SDSHEDAGTLDFSSLLK-298. The N-terminus of the peptide and the primary amine group of lysine residue @18 of the peptide are d6-RABA-tagged. Note: each d6-RABA tagging adds 48 Da to the peptide mass. Fragmentation was performed by application of collision energy, 43.0 in vendor-defined arbitrary units.

**11. Myosin-binding protein C, cardiac-type [Mus musculus]/Ser-273**  
**[r6: RABA:d(6)-tag; p: phosphorylation]**

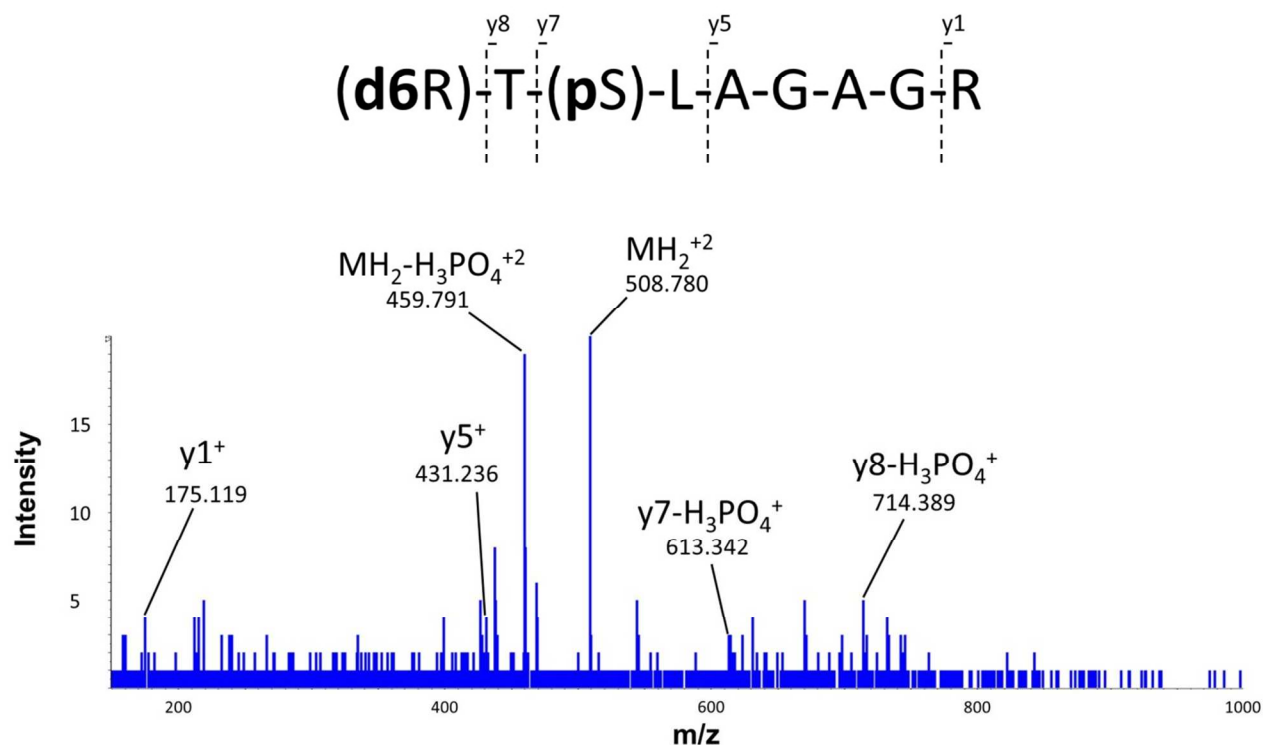

**Supplementary Figure 12:** MS/MS fragmentation spectrum obtained for the precursor ion at m/z: 508.7791 Da (+2), that represents 271-RT(**pS**)LAGAGR-279. The N-terminus of the peptide is d6-RABA-tagged. Note: each d6-RABA tagging adds 48 Da to the peptide mass. Fragmentation was performed by application of collision energy, 43.0 in vendor-defined arbitrary units.

## 12. Myosin-binding protein C, cardiac-type [Mus musculus]/Ser-282

[r0: RABA:d(0)-tag; p: phosphorylation]

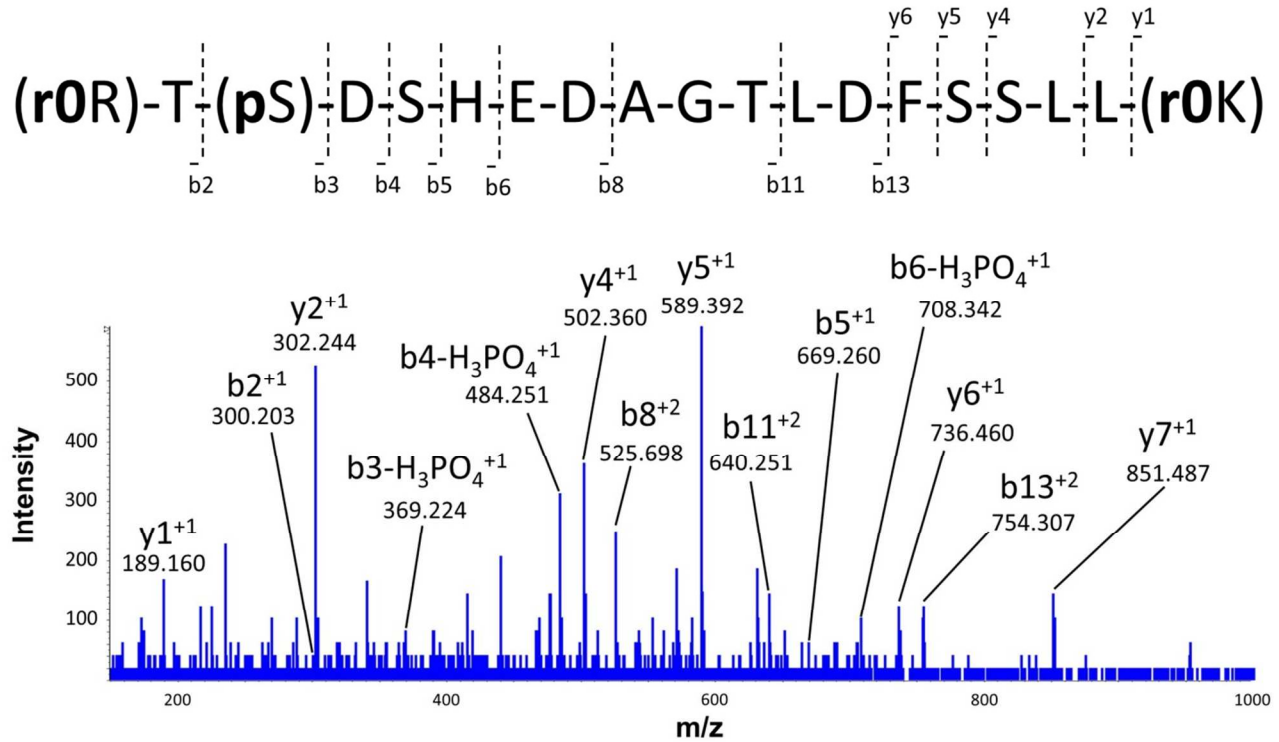

**Supplementary Figure 13:** MS/MS fragmentation spectrum obtained for the precursor ion at m/z: 561.5196 Da (+4), that represents 280-RT(pS)DSHEDAGTLDFSSLLK-298. The N-terminus of the peptide and the primary amine group of lysine residue @19 of the peptide are d0-RABA-tagged. Note: each d0-RABA tagging adds 42 Da to the peptide mass. Fragmentation was performed by application of collision energy, 43.0 in vendor-defined arbitrary units.

[**r0**: RABA:d(0)-tag; **p**: phosphorylation]

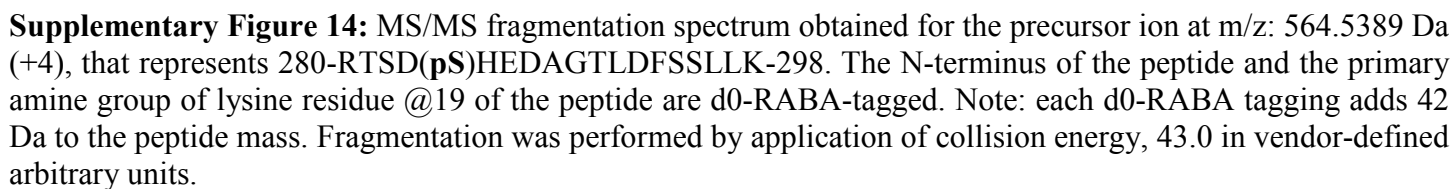



**[r6: RABA:d(6)-tag; p: phosphorylation]**

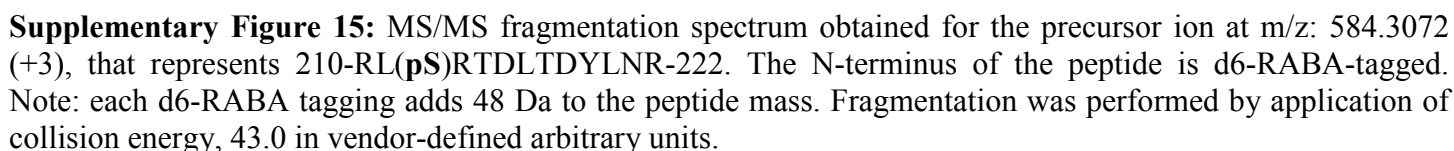

15. 2-oxoisovalerate dehydrogenase subunit alpha, mitochondrial [Mus musculus]/Ser-338

[r6: RABA:d(6)-tag; p: phosphorylation]

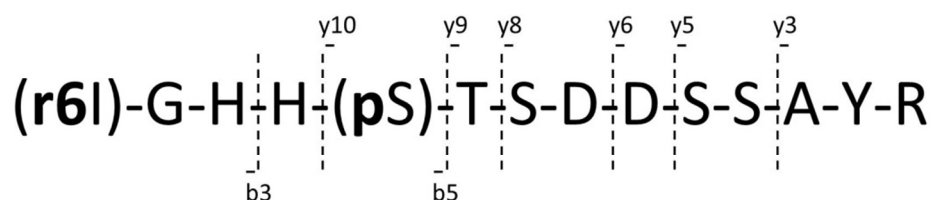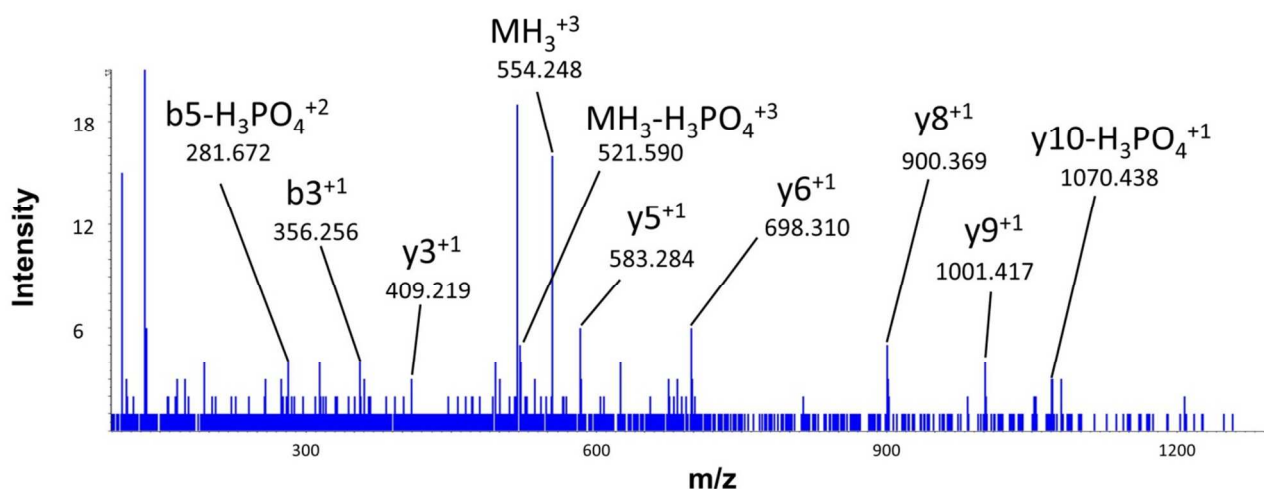

**Supplementary Figure 16:** MS/MS fragmentation spectrum obtained for the precursor ion at m/z: 554.2445 (+3), that represents 334-IGHH(pS)TSDDSSAYR-347. The N-terminus of the peptide is d6-RABA-tagged. Note: each d6-RABA tagging adds 48 Da to the peptide mass. Fragmentation was performed by application of collision energy, 43.0 in vendor-defined arbitrary units.

**16. Myoglobin [Mus musculus]/Thr-68:**

**(Note: MS/MS spectra obtained for both doubly protonated 2+ peptide ion and triply protonated 3+ peptide ion are evaluated simultaneously for high confidence validation of sequence information)**

[a: acetyl; c: carbamidomethyl; r6: RABA:d(6)-tag; p: phosphorylation]

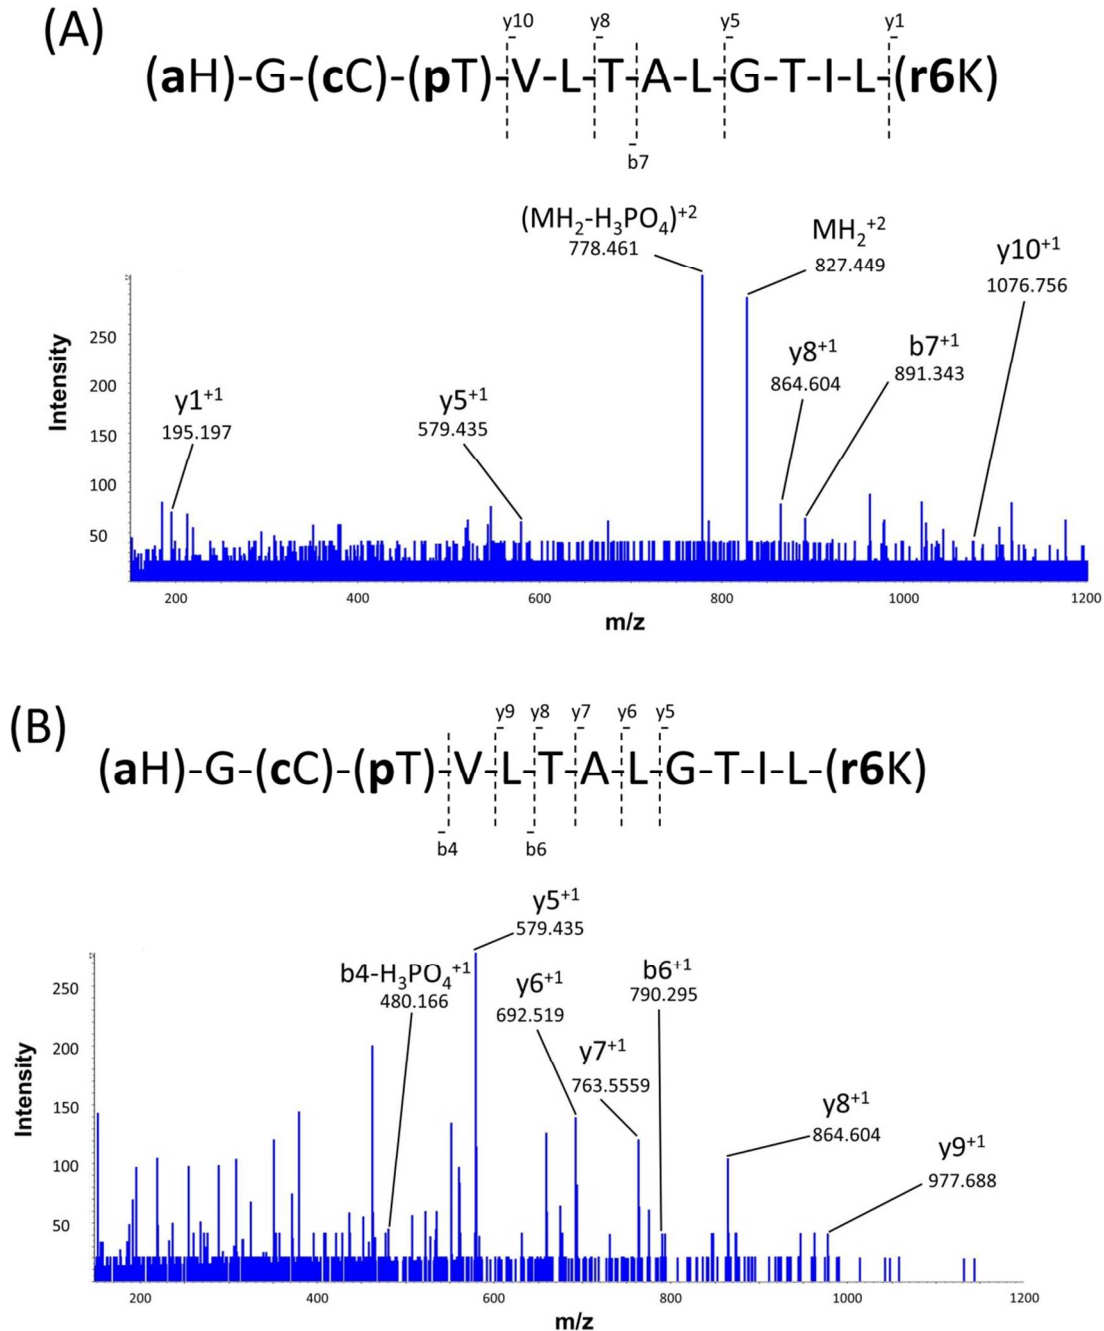

**Supplementary Figure 2:** MS/MS fragmentation spectra obtained for the precursor ions at m/z A) 827.4479 Da (+2) and B) 551.9666 Da (3+), which represent 65-HGC(pT)VLTALGTILK-78. The N-terminus is acetylated and the cystine residue @3 is carbamidomethylated. The primary amine group of lysine residue @14 of the peptide is d6-RABA-tagged. Note: each d6-RABA tagging adds 48 Da to the peptide mass. Fragmentation was performed by application of collision energy, 43.0 in vendor-defined arbitrary units.

**A. Relative Quantification Figures of Phosphopeptides that are Determined  
as Targets with Statistical High Confidence**

## 17. Myoglobin/ Thr-68

(A)

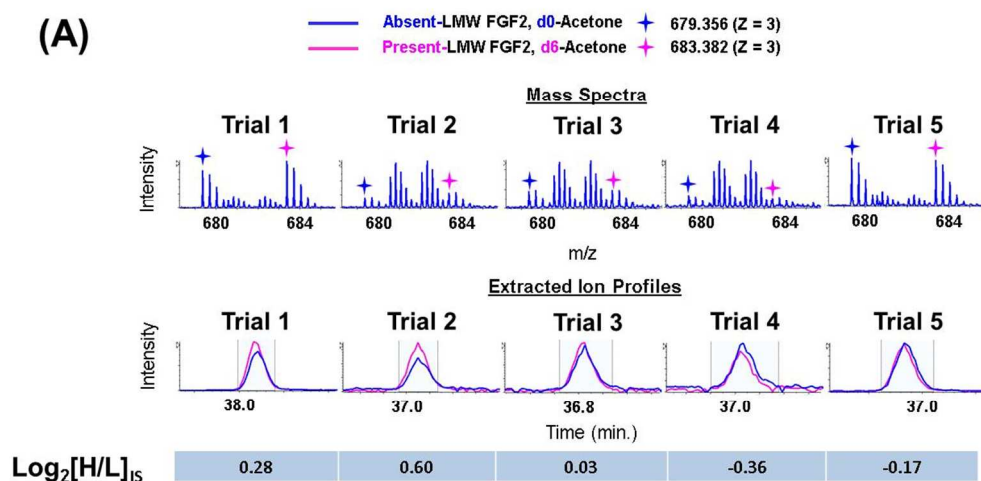

(B)

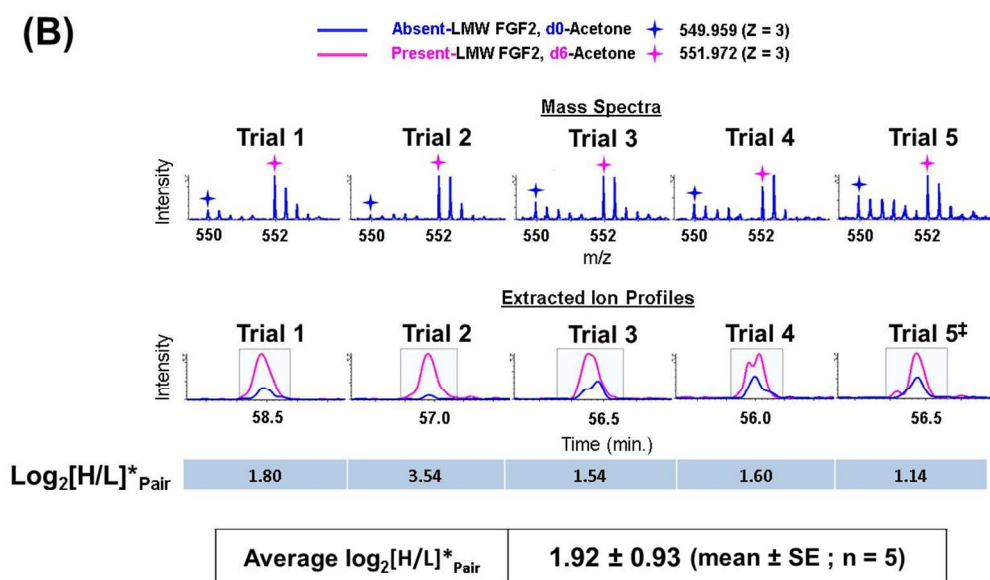

**Supplemental Figure 17:** Relative quantitative comparison of phosphopeptide—65-HGC(pT)VLTALGTILK-78, in LMW FGF2 “non-expressed” and FGF2 HMWKO (LMW FGF2 “expressed”) mouse hearts subjected to 60 minutes of ischemia and 5 minutes of reperfusion. This phosphopeptide represents the protein phosphorylation of myoglobin [Mus musculus]/Thr-68 (A) Relative quantification figure of external standard phosphopeptide pair—m/z 679.356 and 683.385 representing 104-YKVPQLEIVPN(pS)AEER-119 with modifications RABA@N-term, RABA(K)@2 and charge state 3+. Biologically distinct replicates that are denoted with “replicate numbers”. Below each replicate number are the respective averaged MS spectra and respective extracted ion chromatograms (XICs) for the phosphopeptide pair. Respective  $\text{Log}_2[\text{H/L}]_{\text{IS}}$  values are indicated to denote procedural errors associated to each replicate. (B) Relative quantification figure of phosphopeptide—65-HGC(pT)VLTALGTILK-78 with significant phosphorylation changes between the two types of hearts. Mass spectral responses representing the phosphopeptide pair—m/z 549.959 and 551.972 represents 65-HGC(pT)VLTALGTILK-78 with modifications Acetyl@N-term; Carbamidomethyl(C)@3; RABA(K)@14 and charge state 3+. Respective  $\text{Log}_2[\text{H/L}]^*_{\text{Pair}}$  values indicate differences in phosphorylation associated to each replicate. Note: \*Ratio of H/L of a phosphopeptide pair is normalized to fully labeled casein phosphopeptide H/L ratio. Average  $\text{log}_2[\text{H/L}]^*_{\text{Pair}}$  with standard error (SE) is indicated to signify that this protein/phosphosite is a potential target.

## 18. Microtubule-associated protein tau isoform a / Ser-191

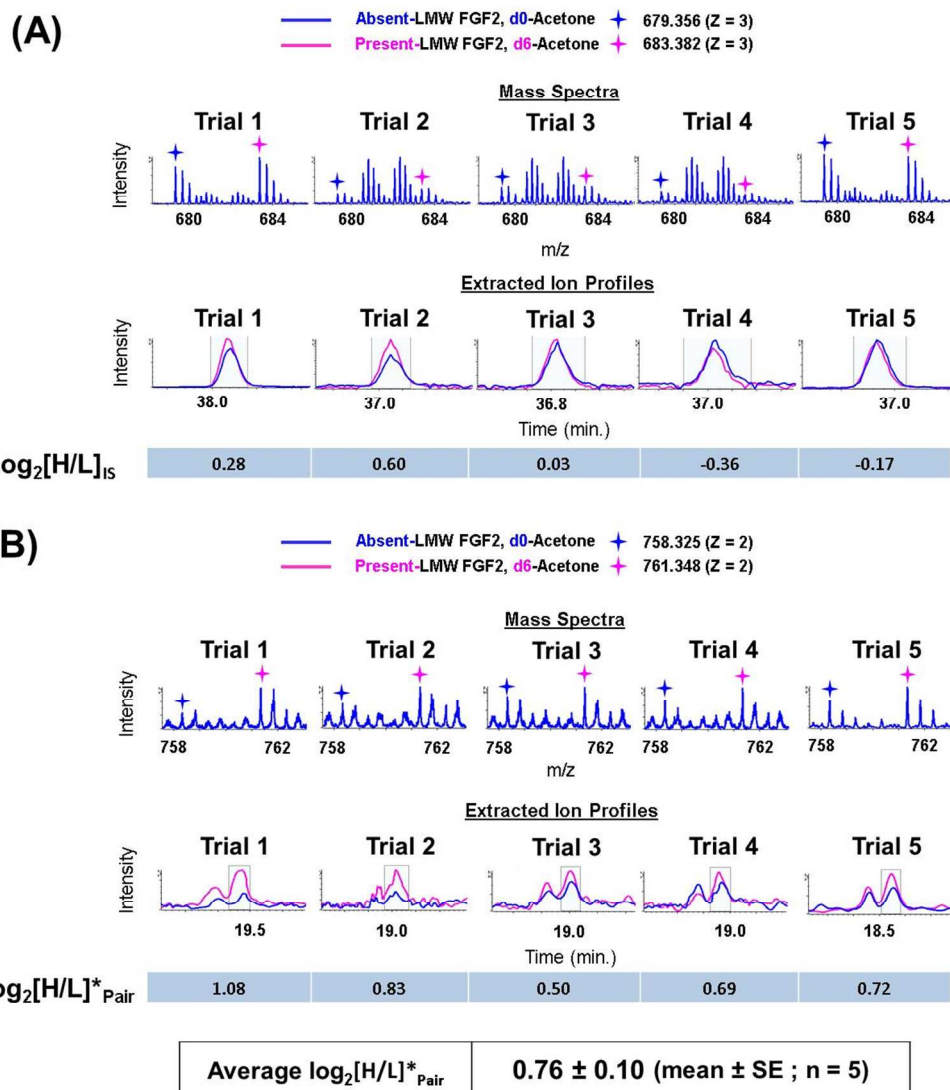

**Supplemental Figure 18:** Relative quantitative comparison of phosphopeptide—184-SGYSSPG(pS)PGTPGSR-198, in LMW FGF2 “non-expressed” and LMW FGF2 “expressed” mouse hearts subjected to 60 minutes of ischemia and 5 minutes of reperfusion. This phosphopeptide represents the protein phosphorylation of Microtubule-associated protein tau isoform a [Mus musculus] /Ser-191 (A) Relative quantification figure of external standard phosphopeptide pair—m/z 679.356 and 683.385 representing 104-YKVPQLEIVPN(pS)AEER-119 with modifications RABA@N-term, RABA(K)@2 and charge state 3+. Biologically distinct replicates that are denoted with “replicate numbers”. Below each replicate number are the respective averaged MS spectra and respective extracted ion chromatograms (XICs) for the phosphopeptide pair. Respective Log<sub>2</sub>[H/L]<sub>IS</sub> values are indicated to denote procedural errors associated to each replicate. (B) Relative quantification figure of phosphopeptide—184-SGYSSPG(pS)PGTPGSR-198 with significant phosphorylation changes between the two types of hearts. Mass spectral responses representing the phosphopeptide pair—m/z 758.325 and 761.348 represents 184-SGYSSPG(pS)PGTPGSR-198 with modifications RABA@N-term and charge state 2+. Respective Log<sub>2</sub>[H/L]\*<sub>Pair</sub> values indicate differences in phosphorylation associated to each replicate. Note: \*Ratio of H/L of a phosphopeptide pair is normalized to fully labeled casein phosphopeptide H/L ratio. Average log<sub>2</sub>[H/L]\*<sub>Pair</sub> with standard error (SE) is indicated to signify that this protein/phosphosite is a potential target.

## 19. Microtubule-associated protein tau isoform a / Ser-393

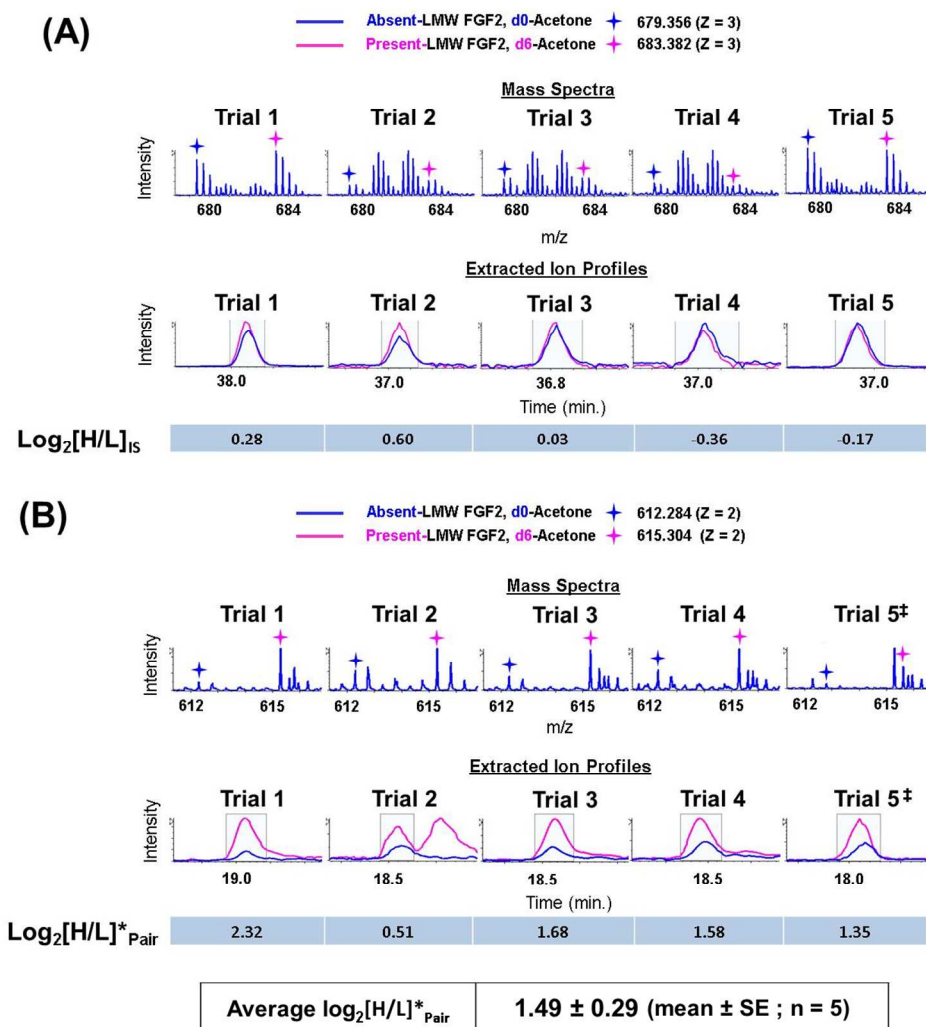

<sup>†</sup> Mono-isotopic peaks were not chosen due to a peak overlap complexity, m/z 561.770 and 564.794 were chosen instead to generate the extracted ion profiles

**Supplemental Figure 19:** Relative quantitative comparison of phosphopeptide—385-SPVVSGDT(pS)PR-395, in LMW FGF2 “non-expressed” and LMW FGF2 “expressed” mouse hearts subjected to 60 minutes of ischemia and 5 minutes of reperfusion. This phosphopeptide represents the protein phosphorylation of Microtubule-associated protein tau isoform a [Mus musculus]/Ser-393 (A) Relative quantification figure of external standard phosphopeptide pair—m/z 679.356 and 683.385 representing 104-YKVPQLEIVN(pS)AEER-119 with modifications RABA@N-term, RABA(K)@2 and charge state 3+. Biologically distinct replicates that are denoted with “replicate numbers”. Below each replicate number are the respective averaged MS spectra and respective extracted ion chromatograms (XICs) for the phosphopeptide pair. Respective Log<sub>2</sub>[H/L]<sub>IS</sub> values are indicated to denote procedural errors associated to each replicate. (B) Relative quantification figure of phosphopeptide—385-SPVVSGDT(pS)PR-395 with significant phosphorylation changes between the two types of hearts. Mass spectral responses representing the phosphopeptide pair—m/z 612.284 and 615.304 represents 385-SPVVSGDT(pS)PR-395 with modifications RABA@N-term and charge state 2+. Respective Log<sub>2</sub>[H/L]<sup>\*</sup><sub>Pair</sub> values indicate differences in phosphorylation associated to each replicate. Note: \*Ratio of H/L of a phosphopeptide pair is normalized to fully labeled casein phosphopeptide H/L ratio. Average log<sub>2</sub>[H/L]<sup>\*</sup><sub>Pair</sub> with standard error (SE) is indicated to signify that this protein/phosphosite is a potential target.



## 20. Gap junction alpha-1 protein / Ser-297

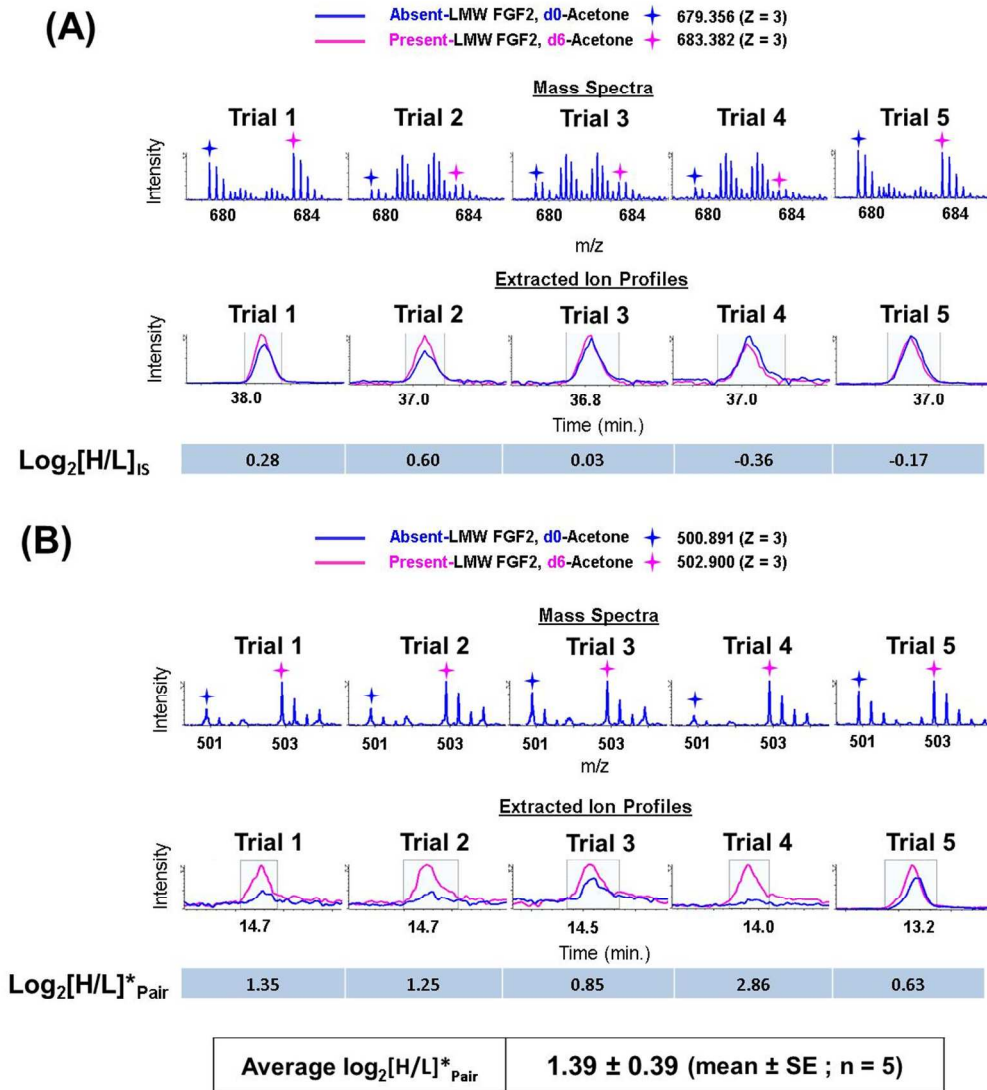

**Supplemental Figure 20:** Relative quantitative comparison of phosphopeptide—288-LVTGDRNNS(pS)CR-299, in LMW FGF2 “non-expressed” and LMW FGF2 “expressed” mouse hearts subjected to 60 minutes of ischemia and 5 minutes of reperfusion. This phosphopeptide represents the protein phosphorylation of gap junction alpha-1 protein [Mus musculus]/Ser-297 (A) Relative quantification figure of external standard phosphopeptide pair—m/z 679.356 and 683.385 representing 104-YKVPQLEIVPN(pS)AEER-119 with modifications RABA@N-term, RABA(K)@2 and charge state 3+. Biologically distinct replicates that are denoted with “replicate numbers”. Below each replicate number are the respective averaged MS spectra and respective extracted ion chromatograms (XICs) for the phosphopeptide pair. Respective  $\text{Log}_2[\text{H/L}]_{\text{IS}}$  values are indicated to denote procedural errors associated to each replicate. (B) Relative quantification figure of phosphopeptide—288-LVTGDRNNS(pS)CR-299 with significant phosphorylation changes between the two types of hearts. Mass spectral responses representing the phosphopeptide pair—m/z 500.891 and 502.900 represents 288-LVTGDRNNS(pS)CR-299 with modifications RABA@N-term, Carbamidomethyl(C)@11 and charge state 3+. Respective  $\text{Log}_2[\text{H/L}]^*_{\text{Pair}}$  values indicate differences in phosphorylation associated to each replicate. Note: \*Ratio of H/L of a phosphopeptide pair is normalized to fully labeled casein phosphopeptide H/L ratio. Average  $\text{log}_2[\text{H/L}]^*_{\text{Pair}}$  with standard error (SE) is indicated to signify that this protein/phosphosite is a potential target.



## 21. Septin-2 a / Ser-218

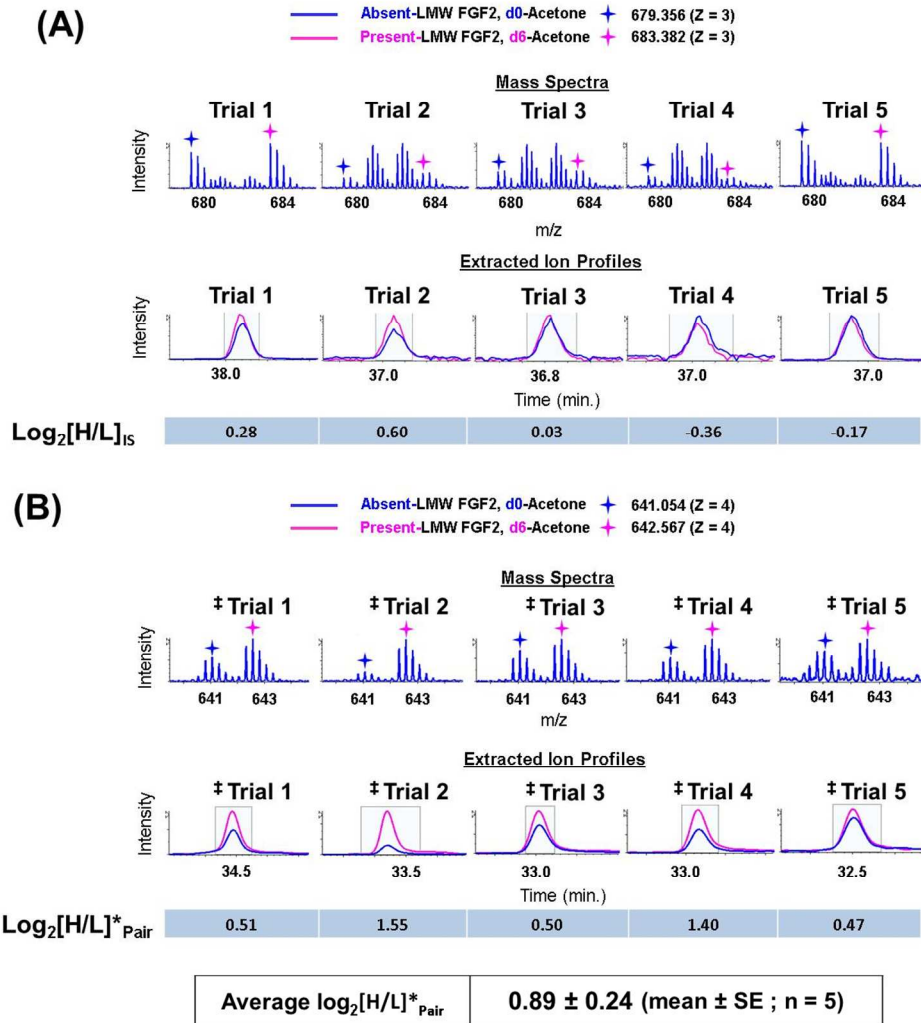

† Mono-isotopic peaks were not chosen due to low abundance of a peak responses, m/z 641.054 and 642.567 were chosen instead to increase confidence in quantification using extracted ion profiles

**Supplemental Figure 21:** Relative quantitative comparison of phosphopeptide—210-IYHLPDAE(pS)DEDEDKFKEQTR-229, in LMW FGF2 “non-expressed” and LMW FGF2 “expressed” mouse hearts subjected to 60 minutes of ischemia and 5 minutes of reperfusion. This phosphopeptide represents the protein phosphorylation of Septin-2 a [Mus musculus]/Ser-218 (A) Relative quantification figure of external standard phosphopeptide pair—m/z 679.356 and 683.385 representing 104-YKVPQLEIVPN(pS)AEER-119 with modifications RABA@N-term, RABA(K)@2 and charge state 3+. Biologically distinct replicates that are denoted with “replicate numbers”. Below each replicate number are the respective averaged MS spectra and respective extracted ion chromatograms (XICs) for the phosphopeptide pair. Respective  $\text{Log}_2[\text{H/L}]_{\text{IS}}$  values are indicated to denote procedural errors associated to each replicate. (B) Relative quantification figure of phosphopeptide—210-IYHLPDAE(pS)DEDEDKFKEQTR-229 with significant phosphorylation changes between the two types of hearts. Mass spectral responses representing the phosphopeptide pair—m/z 640.529 and 642.038 represents 210-IYHLPDAE(pS)DEDEDKFKEQTR-229 with modifications RABA@N-term and charge state 4+. Respective  $\text{Log}_2[\text{H/L}]^*_{\text{Pair}}$  values indicate differences in phosphorylation associated to each replicate. Note: \*Ratio of H/L of a phosphopeptide pair is normalized to fully labeled casein phosphopeptide H/L ratio. Average  $\text{log}_2[\text{H/L}]^*_{\text{Pair}}$  with standard error (SE) is indicated to signify that this protein/phosphosite is a potential target.

## 22. Heat shock protein beta-6 / Ser-157

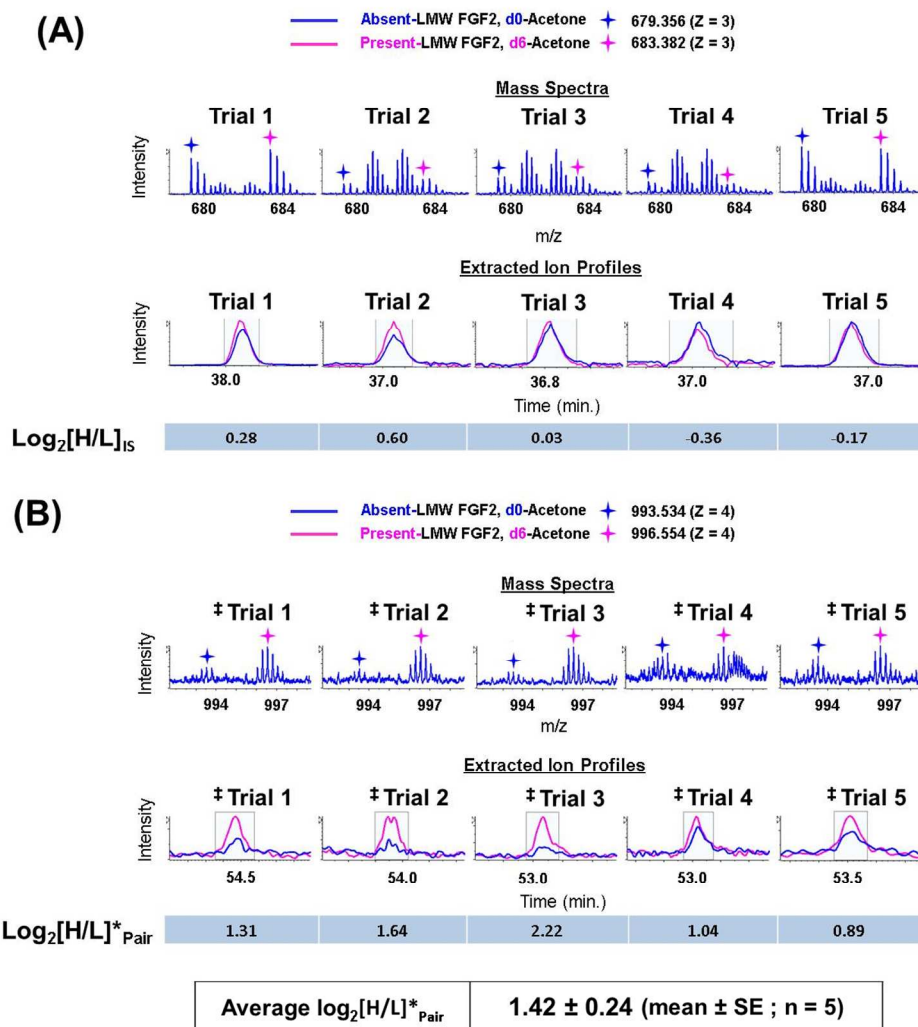

† Mono-isotopic peaks were not chosen due to low abundance of a peak responses, m/z 993.534 and 996.554 were chosen instead to increase confidence in quantification using extracted ion profiles

**Supplemental Figure 22:** Relative quantitative comparison of phosphopeptide—123-LPPGVDPAAVTSALSPEGVLSIQATPASAQAQLP(pS)PPAAK-162, in LMW FGF2 “non-expressed” and LMW FGF2 “expressed” mouse hearts subjected to 60 minutes of ischemia and 5 minutes of reperfusion. This phosphopeptide represents the protein phosphorylation of Heat shock protein beta-6 [Mus musculus]/Ser-157 (A) Relative quantification figure of external standard phosphopeptide pair—m/z 679.356 and 683.385 representing 104-YKVPQLEIVPN(pS)AEER-119 with modifications RABA@N-term, RABA(K)@2 and charge state 3+. Biologically distinct replicates that are denoted with “replicate numbers”. Below each replicate number are the respective averaged MS spectra and respective extracted ion chromatograms (XICs) for the phosphopeptide pair. Respective  $\text{Log}_2[\text{H/L}]_{\text{IS}}$  values are indicated to denote procedural errors associated to each replicate. (B) Relative quantification figure of phosphopeptide—123-LPPGVDPAAVTSALSPEGVLSIQATPASAQAQLP(pS)PPAAK-162 with significant phosphorylation changes between the two types of hearts. Mass spectral responses representing the phosphopeptide pair—m/z 993.034 and 993.056 represents 123-LPPGVDPAAVTSALSPEGVLSIQATPASAQAQLP(pS)PPAAK-162 with modifications RABA@N-term, RABA(K)@40 and charge state 4+. Respective  $\text{Log}_2[\text{H/L}]^*_{\text{Pair}}$  values indicate differences in phosphorylation associated to each replicate. Note: \*Ratio of H/L of a phosphopeptide pair is normalized to fully labeled casein phosphopeptide H/L ratio. Average  $\text{log}_2[\text{H/L}]^*_{\text{Pair}}$  with standard error (SE) is indicated to signify that this protein/phosphosite is a potential target.

## 23. Myosin light chain kinase, smooth muscle / Ser-1469

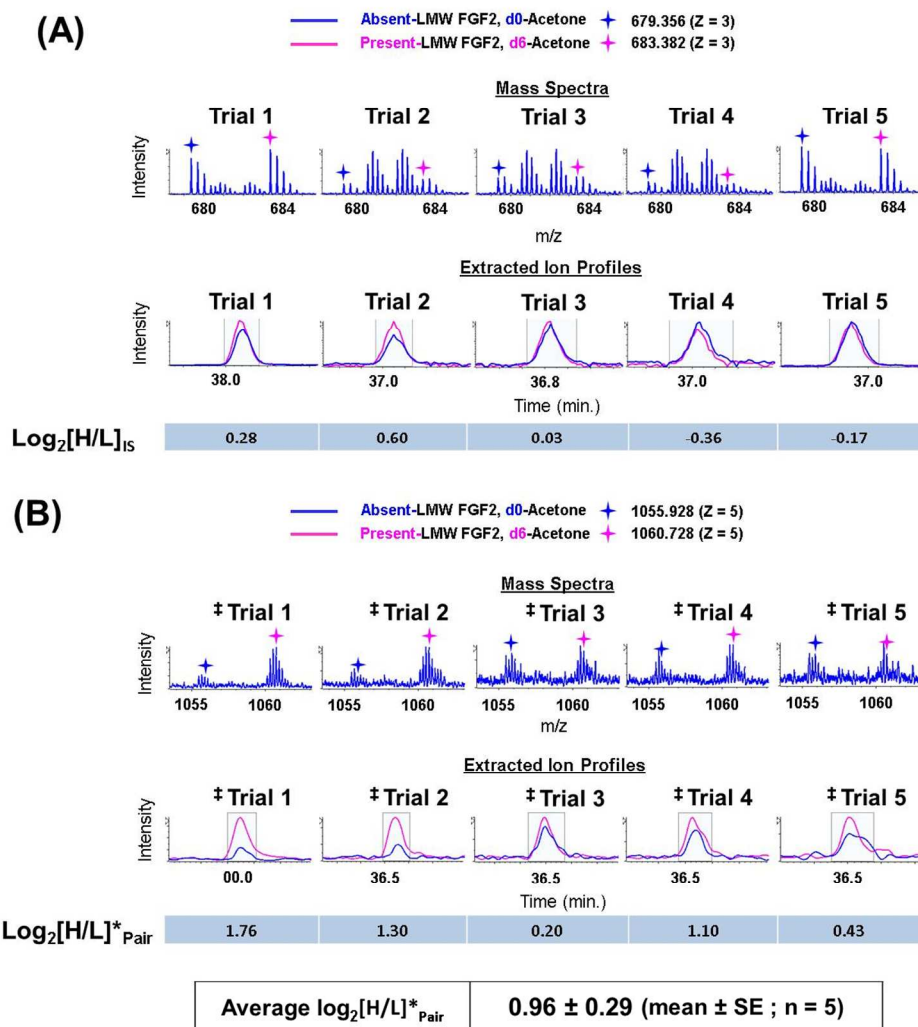

† Mono-isotopic peaks were not chosen due to a peak overlap complexity, m/z 1055.928 and 1060.728 were chosen instead to generate the extracted ion profiles

**Supplemental Figure 23:** Relative quantitative comparison of phosphopeptide—1437-AVNVTGTSSEPSQSELTAVGEKPEEPKDEVEV(pS)DDDEKEPEVDYR-1481, in LMW FGF2 “non-expressed” and LMW FGF2 “expressed” mouse hearts subjected to 60 minutes of ischemia and 5 minutes of reperfusion. This phosphopeptide represents the protein phosphorylation of Myosin light chain kinase, smooth muscle / Ser-1469 (A) Relative quantification figure of external standard phosphopeptide pair—m/z 679.356 and 683.385 representing 104-YKVPQLEIVPN(pS)AEER-119 with modifications RABA@N-term, RABA(K)@2 and charge state 3+. Biologically distinct replicates that are denoted with “replicate numbers”. Below each replicate number are the respective averaged MS spectra and respective extracted ion chromatograms (XICs) for the phosphopeptide pair. Respective  $\text{Log}_2[\text{H/L}]_{\text{IS}}$  values are indicated to denote procedural errors associated to each replicate. (B) Relative quantification figure of phosphopeptide—1437-AVNVTGTSSEPSQSELTAVGEKPEEPKDEVEV(pS)DDDEKEPEVDYR-1481 with significant phosphorylation changes between the two types of hearts. Mass spectral responses representing the phosphopeptide pair—m/z 1055.319 and 1060.119 represents 1437-AVNVTGTSSEPSQSELTAVGEKPEEPKDEVEV(pS)DDDEKEPEVDYR-1481 with modifications RABA@N-term, RABA(K)@22, RABA(K)@27, RABA(K)@38 and charge state 5+. Respective  $\text{Log}_2[\text{H/L}]^*_{\text{Pair}}$  values indicate differences in phosphorylation associated to each replicate. Note: \*Ratio of H/L of a phosphopeptide pair is normalized to fully labeled casein phosphopeptide H/L ratio. Average  $\text{log}_2[\text{H/L}]^*_{\text{Pair}}$  with standard error (SE) is indicated to signify that this protein/phosphosite is a potential target

## 24. Myosin regulatory light chain 2, ventricular/cardiac muscle isoform / Ser-14

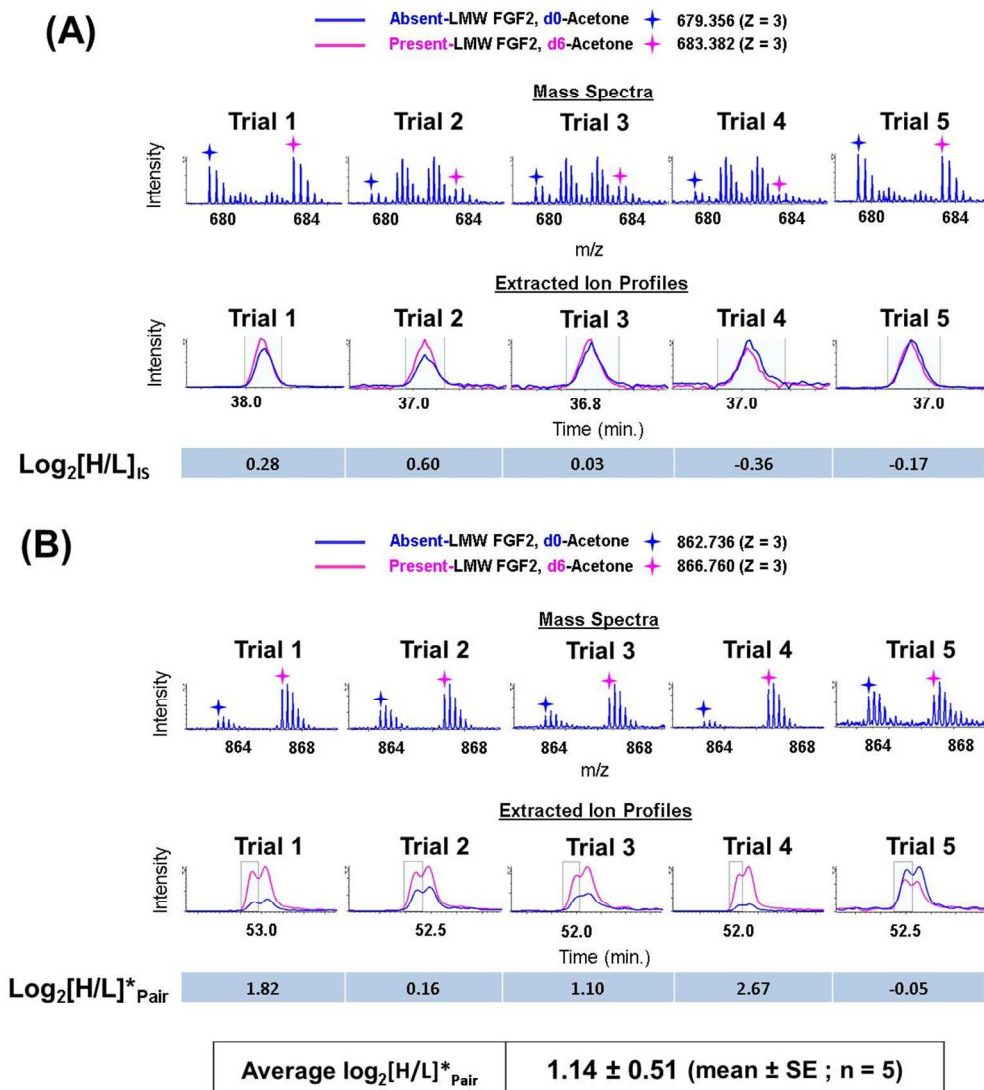

**Supplemental Figure 24:** Relative quantitative comparison of phosphopeptide—8-KRIEGG(pS)SNVFSMFEQTQIQEFK-30 OR 8-KRIEGGS(pS)NVFSMFEQTQIQEFK-30, in LMW FGF2 “non-expressed” and LMW FGF2 “expressed” mouse hearts subjected to 60 minutes of ischemia and 5 minutes of reperfusion. This phosphopeptide represents the protein phosphorylation of Myosin regulatory light chain 2, ventricular/cardiac muscle isoform [Mus musculus]/Ser-14 OR Ser-15 (A) Relative quantification figure of external standard phosphopeptide pair—m/z 679.356 and 683.385 representing 104-YKVPQLEIVPN(pS)AEER-119 with modifications RABA@N-term, RABA(K)@2 and charge state 3+. Biologically distinct replicates that are denoted with “replicate numbers”. Below each replicate number are the respective averaged MS spectra and respective extracted ion chromatograms (XICs) for the phosphopeptide pair. Respective  $\text{Log}_2[\text{H/L}]_{\text{IS}}$  values are indicated to denote procedural errors associated to each replicate. (B) Relative quantification figure of phosphopeptide—8-KRIEGG(pS)SNVFSMFEQTQIQEFK-30 OR 8-KRIEGGS(pS)NVFSMFEQTQIQEFK-30 with significant phosphorylation changes between the two types of hearts. Mass spectral responses representing the phosphopeptide pair—m/z 862.736 and 866.760 represents 8-KRIEGG(pS)SNVFSMFEQTQIQEFK-30 OR 8-KRIEGGS(pS)NVFSMFEQTQIQEFK-30 with modifications RABA@N-term, RABA(K)@21, Oxidation(M)@11, and charge state 3+. Respective  $\text{Log}_2[\text{H/L}]^*_{\text{Pair}}$  values indicate differences in phosphorylation associated to each replicate. Note: \*Ratio of H/L of a phosphopeptide pair is normalized to fully labeled casein phosphopeptide H/L ratio. Average  $\text{log}_2[\text{H/L}]^*_{\text{Pair}}$  with standard error (SE) is indicated to signify that this protein/phosphosite is a potential target.



## 25. Myosin regulatory light chain 2, ventricular/cardiac muscle isoform / Ser-15

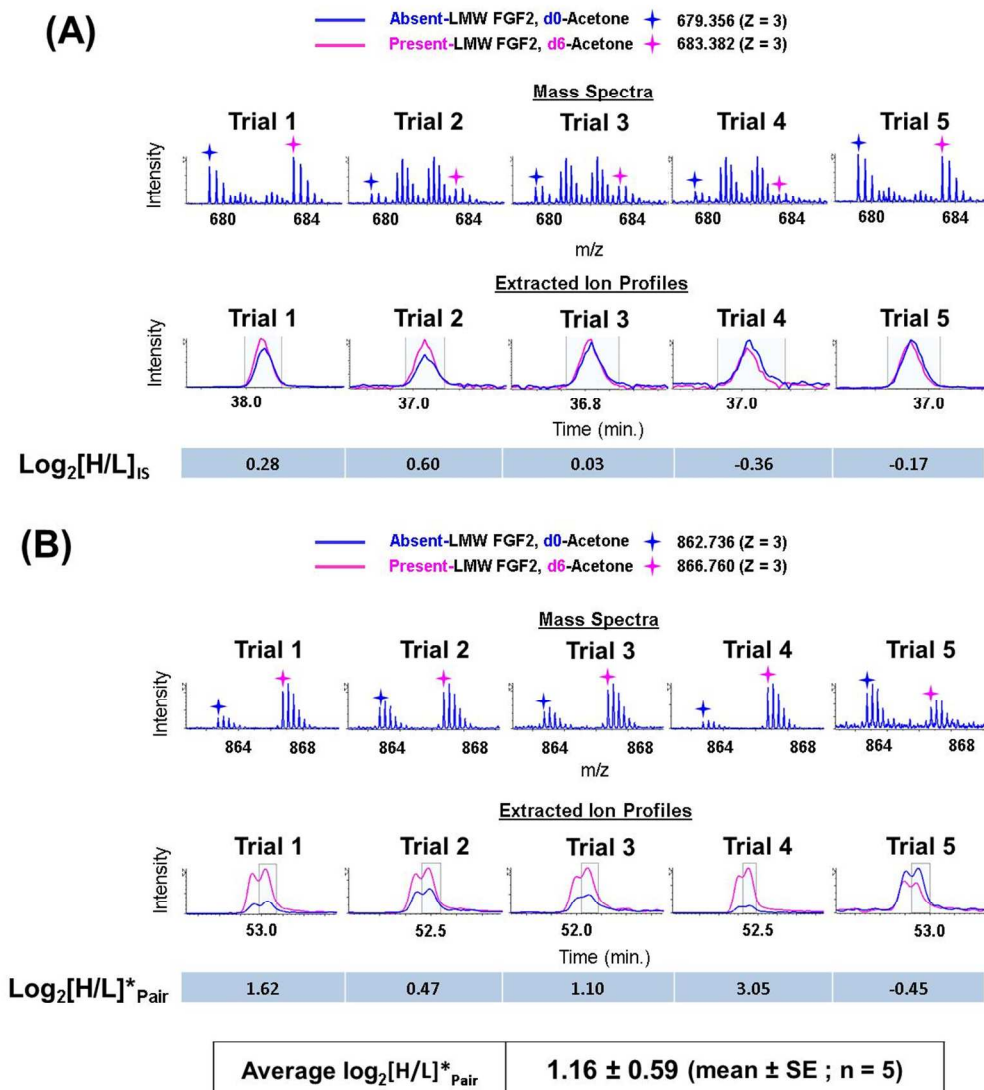

**Supplemental Figure 25:** Relative quantitative comparison of phosphopeptide—8-KRIEGG(pS)SNVFSMFEQTQIQEFK-30 OR 8-KRIEGGS(pS)NVFSMFEQTQIQEFK-30, in LMW FGF2 “non-expressed” and LMW FGF2 “expressed” mouse hearts subjected to 60 minutes of ischemia and 5 minutes of reperfusion. This phosphopeptide represents the protein phosphorylation of Myosin regulatory light chain 2, ventricular/cardiac muscle isoform [Mus musculus]/Ser-14 OR Ser-15 (A) Relative quantification figure of external standard phosphopeptide pair—m/z 679.356 and 683.385 representing 104-YKVPQLEIVPN(pS)AEER-119 with modifications RABA@N-term, RABA(K)@2 and charge state 3+. Biologically distinct replicates that are denoted with “replicate numbers”. Below each replicate number are the respective averaged MS spectra and respective extracted ion chromatograms (XICs) for the phosphopeptide pair. Respective Log<sub>2</sub>[H/L]<sub>IS</sub> values are indicated to denote procedural errors associated to each replicate. (B) Relative quantification figure of phosphopeptide—8-KRIEGG(pS)SNVFSMFEQTQIQEFK-30 OR 8-KRIEGGS(pS)NVFSMFEQTQIQEFK-30 with significant phosphorylation changes between the two types of hearts. Mass spectral responses representing the phosphopeptide pair—m/z 862.736 and 866.760 represents 8-KRIEGG(pS)SNVFSMFEQTQIQEFK-30 OR 8-KRIEGGS(pS)NVFSMFEQTQIQEFK-30 with modifications RABA@N-term, RABA(K)@21, Oxidation(M)@11, and charge state 3+. Respective Log<sub>2</sub>[H/L]<sup>\*</sup><sub>Pair</sub> values indicate differences in phosphorylation associated to each replicate. Note: \*Ratio of H/L of a phosphopeptide pair is normalized to fully labeled casein phosphopeptide H/L ratio. Average log<sub>2</sub>[H/L]<sup>\*</sup><sub>Pair</sub> with standard error (SE) is indicated to signify that this protein/phosphosite is a potential target.

## 26. Myosin-binding protein C, cardiac-type / Thr-281

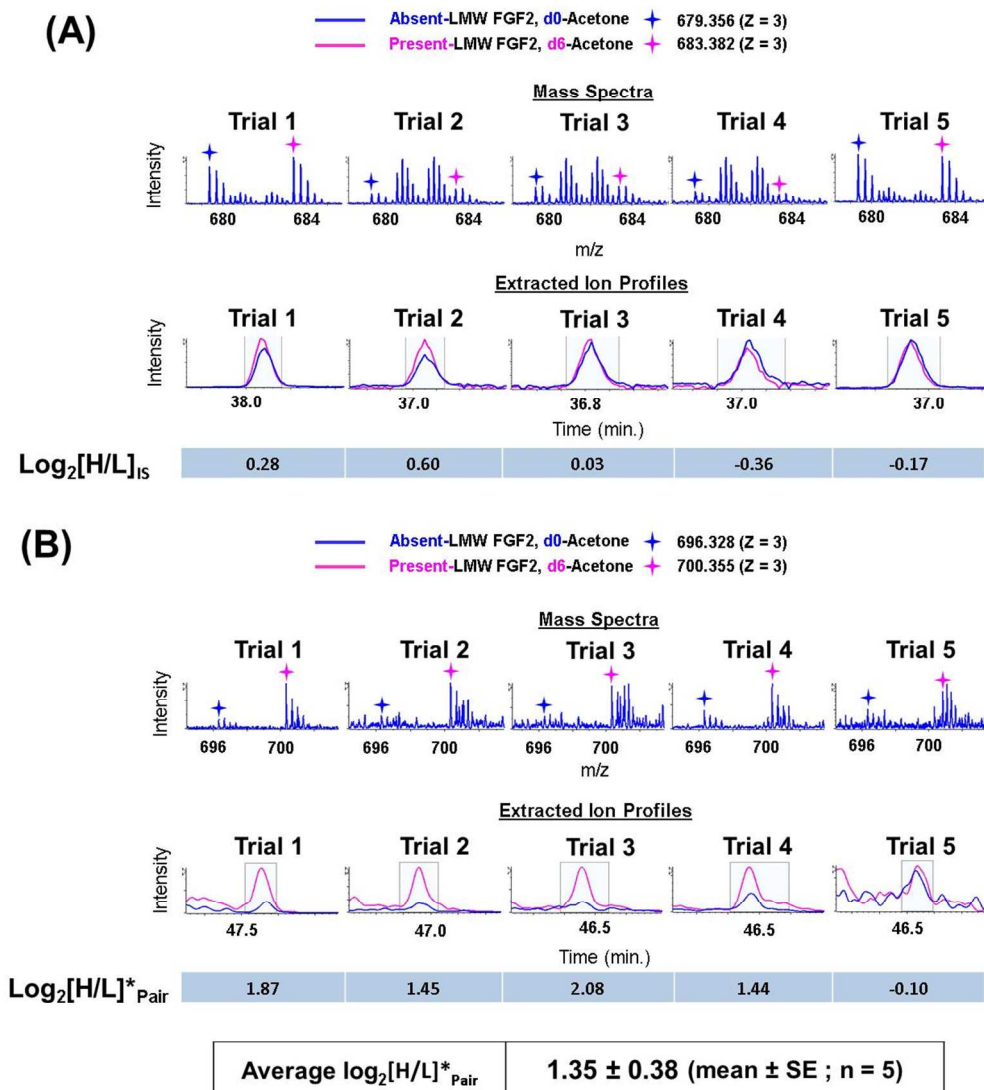

**Supplemental Figure 26:** Relative quantitative comparison of phosphopeptide—281-(pT)SDSHEDAGTLDFSSLLK-298, in LMW FGF2 “non-expressed” and LMW FGF2 “expressed” mouse hearts subjected to 60 minutes of ischemia and 5 minutes of reperfusion. This phosphopeptide represents the protein phosphorylation of Myosin-binding protein C [Mus musculus]/Thr-281 (A) Relative quantification figure of external standard phosphopeptide pair—m/z 679.356 and 683.385 representing 104-YKVPQLEIVPN(pS)AEER-119 with modifications RABA@N-term, RABA(K)@2 and charge state 3+. Biologically distinct replicates that are denoted with “replicate numbers”. Below each replicate number are the respective averaged MS spectra and respective extracted ion chromatograms (XICs) for the phosphopeptide pair. Respective Log<sub>2</sub>[H/L]<sub>IS</sub> values are indicated to denote procedural errors associated to each replicate. (B) Relative quantification figure of phosphopeptide—281-(pT)SDSHEDAGTLDFSSLLK-298 with significant phosphorylation changes between the two types of hearts. Mass spectral responses representing the phosphopeptide pair—m/z 696.328 and 700.355 represents 281-(pT)SDSHEDAGTLDFSSLLK-298 with modifications RABA@N-term, RABA(K)@18 and charge state 3+. Respective Log<sub>2</sub>[H/L]\*<sub>Pair</sub> values indicate differences in phosphorylation associated to each replicate. Note: \*Ratio of H/L of a phosphopeptide pair is normalized to fully labeled casein phosphopeptide H/L ratio. Average log<sub>2</sub>[H/L]\*<sub>Pair</sub> with standard error (SE) is indicated to signify that this protein/phosphosite is a potential target.

## 27. Myosin-binding protein C, cardiac-type / Ser-273

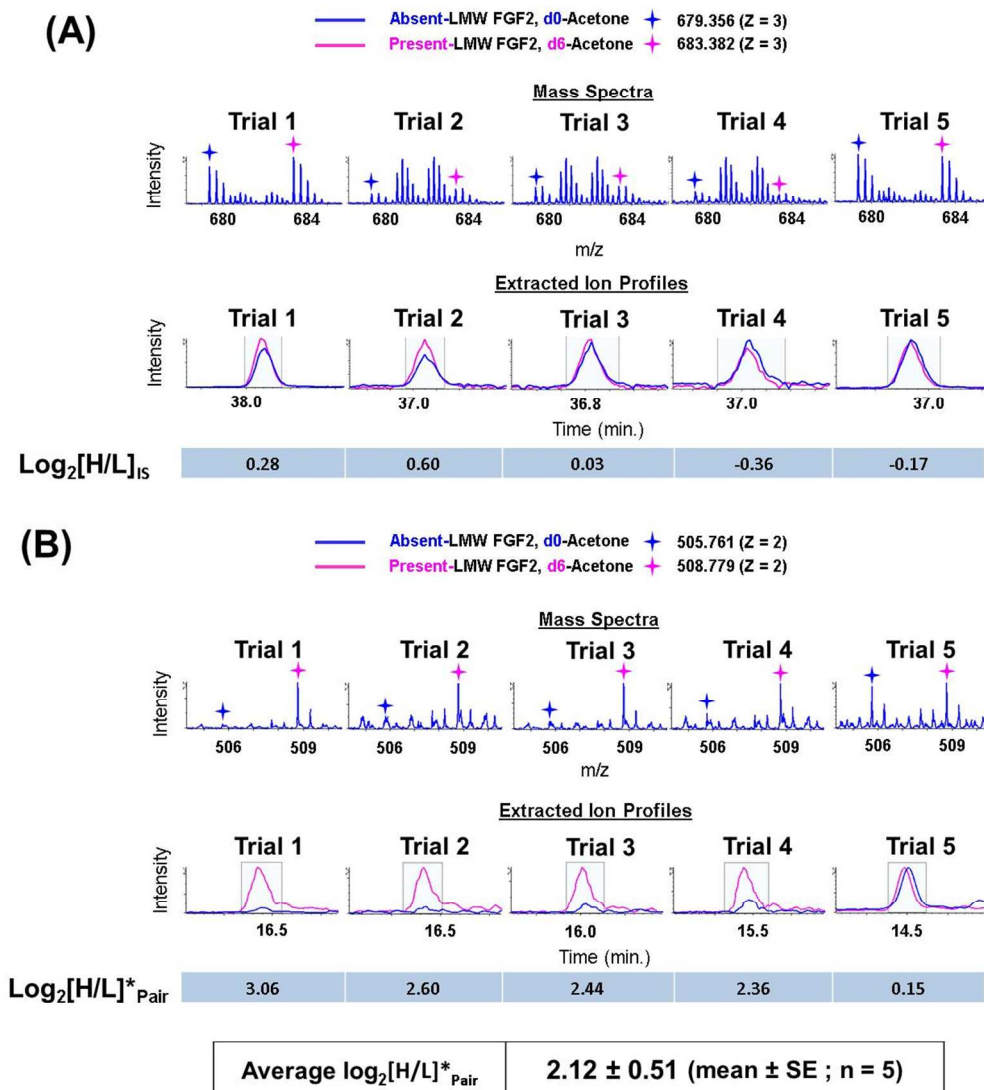

**Supplemental Figure 27:** Relative quantitative comparison of phosphopeptide—271-RT(pS)LAGAGR-279, in LMW FGF2 “non-expressed” and LMW FGF2 “expressed” mouse hearts subjected to 60 minutes of ischemia and 5 minutes of reperfusion. This phosphopeptide represents the protein phosphorylation of Myosin-binding protein C [Mus musculus]/Ser-273 (A) Relative quantification figure of external standard phosphopeptide pair—m/z 679.356 and 683.385 representing 104-YKVPQLEIVPN(pS)AEER-119 with modifications RABA@N-term, RABA(K)@2 and charge state 3+. Biologically distinct replicates that are denoted with “replicate numbers”. Below each replicate number are the respective averaged MS spectra and respective extracted ion chromatograms (XICs) for the phosphopeptide pair. Respective Log<sub>2</sub>[H/L]<sub>IS</sub> values are indicated to denote procedural errors associated to each replicate. (B) Relative quantification figure of phosphopeptide—271-RT(pS)LAGAGR-279 with significant phosphorylation changes between the two types of hearts. Mass spectral responses representing the phosphopeptide pair—m/z 505.761 and 508.779 represents 271-RT(pS)LAGAGR-279 with modifications RABA@N-term and charge state 2+. Respective Log<sub>2</sub>[H/L]<sup>\*</sup><sub>Pair</sub> values indicate differences in phosphorylation associated to each replicate. Note: \*Ratio of H/L of a phosphopeptide pair is normalized to fully labeled casein phosphopeptide H/L ratio. Average log<sub>2</sub>[H/L]<sup>\*</sup><sub>Pair</sub> with standard error (SE) is indicated to signify that this protein/phosphosite is a potential target.

## 28. Cytochrome b-c1 complex subunit 1, mitochondrial precursor / Ser-212

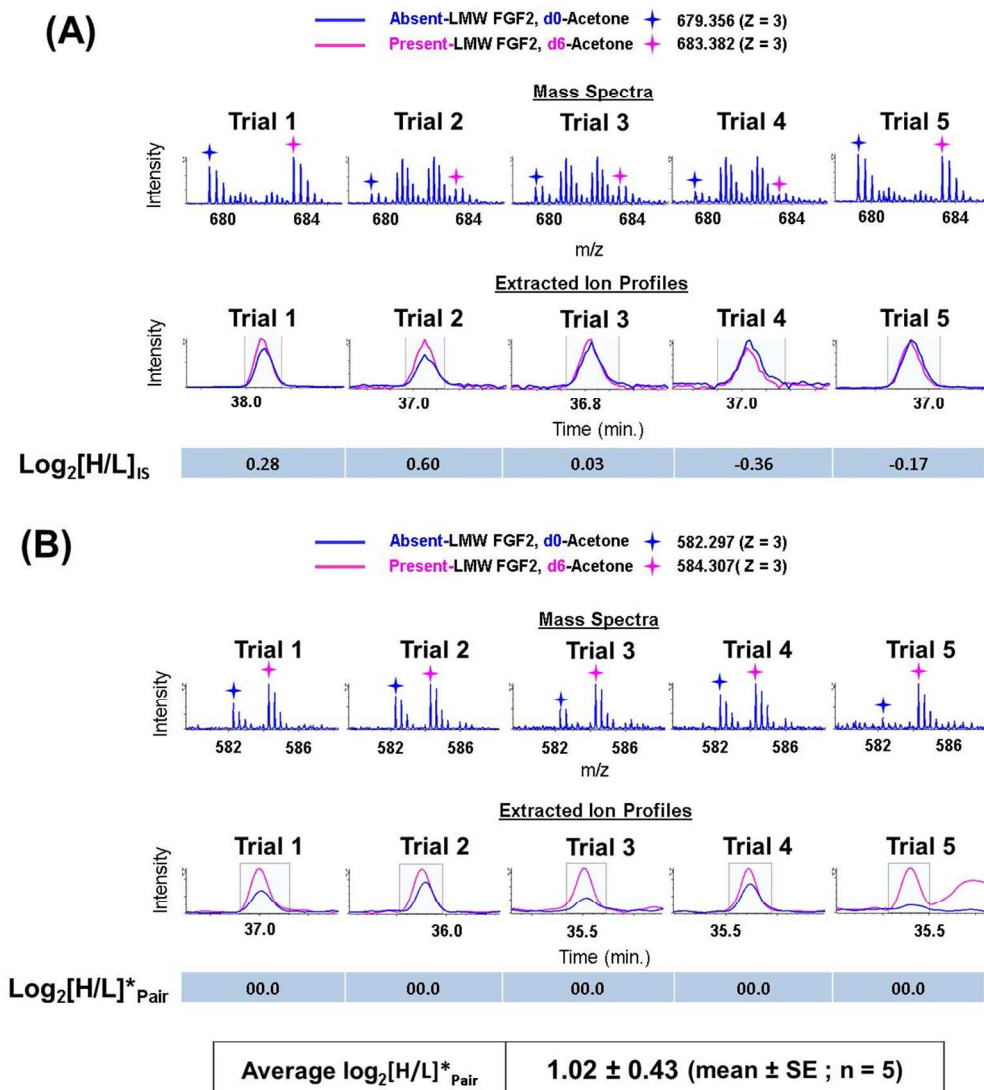

**Supplemental Figure 28:** Relative quantitative comparison of phosphopeptide—210-RL(pS)RTDLTDYLN-222, in LMW FGF2 “non-expressed” and LMW FGF2 “expressed” mouse hearts subjected to 60 minutes of ischemia and 5 minutes of reperfusion. This phosphopeptide represents the protein phosphorylation of Cytochrome b-c1 complex subunit 1, mitochondrial precursor [Mus musculus]/Ser-212 (A) Relative quantification figure of external standard phosphopeptide pair—m/z 679.356 and 683.385 representing 104-YKVPQLEIVPN(pS)AEER-119 with modifications RABA@N-term, RABA(K)@2 and charge state 3+. Biologically distinct replicates that are denoted with “replicate” numbers. Below each replicate number are the respective averaged MS spectra and respective extracted ion chromatograms (XICs) for the phosphopeptide pair. Respective Log<sub>2</sub>[H/L]<sub>IS</sub> values are indicated to denote procedural errors associated to each replicate. (B) Relative quantification figure of phosphopeptide—210-RL(pS)RTDLTDYLN-222 with significant phosphorylation changes between the two types of hearts. Mass spectral responses representing the phosphopeptide pair—m/z 582.297 and 584.307 represents 210-RL(pS)RTDLTDYLN-222 with modifications RABA@N-term and charge state 3+. Respective Log<sub>2</sub>[H/L]<sup>\*</sup><sub>Pair</sub> values indicate differences in phosphorylation associated to each replicate. Note: \*Ratio of H/L of a phosphopeptide pair is normalized to fully labeled casein phosphopeptide H/L ratio. Average log<sub>2</sub>[H/L]<sup>\*</sup><sub>Pair</sub> with standard error (SE) is indicated to signify that this protein/phosphosite is a potential target.



## 29. 2-Oxoisovalerate dehydrogenase subunit alpha, mitochondrial / Ser-338

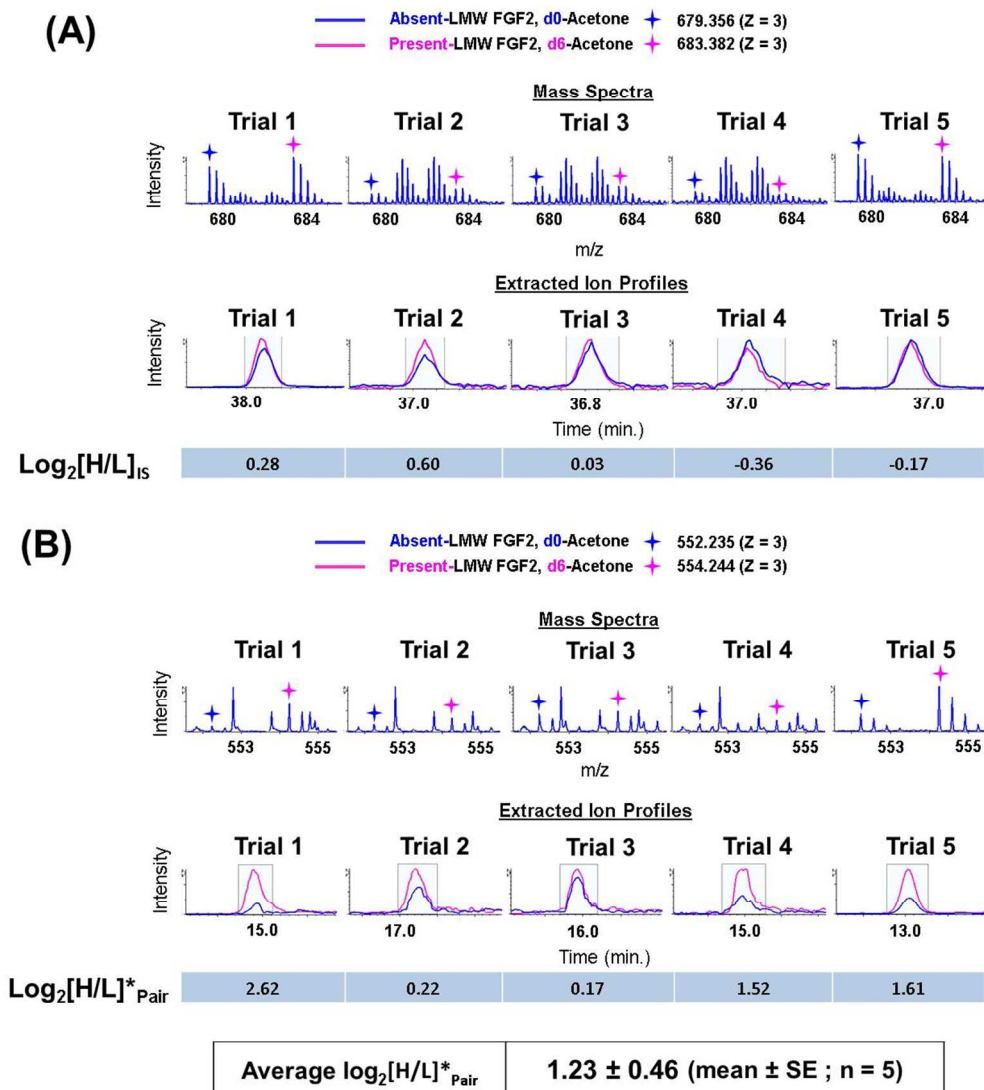

**Supplemental Figure 29:** Relative quantitative comparison of phosphopeptide—334-IGHH(pS)TSDDSSAYR-347, in LMW FGF2 “non-expressed” and LMW FGF2 “expressed” mouse hearts subjected to 60 minutes of ischemia and 5 minutes of reperfusion. This phosphopeptide represents the protein phosphorylation of 2-Oxoisovalerate dehydrogenase subunit alpha, mitochondrial [Mus musculus]/Ser-338 (A) Relative quantification figure of external standard phosphopeptide pair—m/z 679.356 and 683.385 representing 104-YKVPQLEIVPN(pS)AEER-119 with modifications RABA@N-term, RABA(K)@2 and charge state 3+. Biologically distinct replicates that are denoted with “replicate numbers”. Below each replicate number are the respective averaged MS spectra and respective extracted ion chromatograms (XICs) for the phosphopeptide pair. Respective Log<sub>2</sub>[H/L]<sub>IS</sub> values are indicated to denote procedural errors associated to each replicate. (B) Relative quantification figure of phosphopeptide—334-IGHH(pS)TSDDSSAYR-347 with significant phosphorylation changes between the two types of hearts. Mass spectral responses representing the phosphopeptide pair—m/z 552.235 and 554.244 represents 334-IGHH(pS)TSDDSSAYR-347 with modifications RABA@N-term and charge state 3+. Respective Log<sub>2</sub>[H/L]\*<sub>Pair</sub> values indicate differences in phosphorylation associated to each replicate. Note: \*Ratio of H/L of a phosphopeptide pair is normalized to fully labeled casein phosphopeptide H/L ratio. Average log<sub>2</sub>[H/L]\*<sub>Pair</sub> with standard error (SE) is indicated to signify that this protein/phosphosite is a potential target.
